# Supplementary material for: The Predatory Ecology of Deinonychus and the Origin of Flapping in Birds
Source: PLoS One. 2011 Dec 14;6(12):e28964. doi: 10.1371/journal.pone.0028964 (PMC3237572; doi:10.1371/journal.pone.0028964)
Supplement: Table S1 — This table comprises raw measurement data and calculated ratios for dinosaurs measured for this study, and comparative data from Fowler et al. [20]. (XLS) [file pone.0028964.s004.xls]

## Sheet: All data
Table S1:			Ungual measurements								Calculated ungual values (outer)					Non-ungual phalanx measurements					Phalanx Ratios
Specimen		Digit	Outer curvature			Inner curvature			Hp	Metatarsus length	Ratio to D-III			ungual radius	ALo	D-x-1 length	D-x-2 length	D-x-3 length	D-x-4 length	Combined Length	Phal. size rel. to D-x-1			Phal. size rel. to D-III-1
			Ao	Hmo	Oo	Ai	Hmi	Oi			Ao	Hmo	Oo								D-x-2	D-x-3	D-x-4	D-x-1	D-x-2	D-x-3	D-x-4
Deinonychus		I*	3.86903	1.06028	91.9	1.88972	0.59944	47.6	1.94308		0.681398	0.966756	1.08118	2.69156	4.31715	2.73								0.536346
Dromaeosauridae		II*	8.22488	1.78791	105.3	4.99125	1.27993	81	3.26792		1.44853	1.6302	1.23882	5.17324	9.50755	3.76	4.09			7.85	1.08777			0.738703	0.803536
MOR-747		III*	5.67808	1.09674	85	3.19521	0.71025	46.3	2.54746	15.121	1	1	1	4.20231	6.23425	5.09	3.29	3.25		11.63	0.646365	0.638507		1	0.646365	0.638507
	Right	IV*	4.72524	0.99238	91.9	2.65729	0.67638	58.8	2.19851		0.83219	0.904845	1.08118	3.2872	5.27253	4.33	3.7	2.59	2.5	13.12	0.854503	0.598152	0.577367	0.850688		0.508841	0.491159
Deinonychus		I*	3.46158	0.89442	95.4	1.99438	0.58318	74.6	1.60927		0.707632	0.895629	1.09908	2.34007	3.89632	2.73								0.565217
Dromaeosauridae		II*	7.56766	1.65088	108.6	4.54946	1.22351	85.9	3.03916		1.54702	1.65311	1.25115	4.65941	8.83157	3.64	3.76			7.4	1.03297			0.753623	0.778468
MOR-747		III*	4.89178	0.99865	86.8	2.61133	0.61987	55.5	2.24691	13.9	1	1	1	3.55979	5.39289	4.83	3.52	3.25		11.6	0.728778	0.672878		1	0.728778	0.672878
	Left	IV*	4.35821	0.89565	65.9	2.44664	0.55485	33.8	1.88641		0.890925	0.896861	0.759217	4.00639	4.60804	4.27	3.18	2.7	2.43	12.58	0.744731	0.632319	0.569087	0.884058	0.658385	0.559006	0.503106
Deinonychus		I*														2.62								0.504817
Dromaeosauridae		II*																		0
MOR-747		III*														5.19	3.6	3.15		11.94	0.693642	0.606936		1	0.693642	0.606936
	Left	IV*														4.13	3.7	2.73	2.54	13.1	0.895884	0.661017	0.615012	0.795761		0.526012	0.489403
Deinonychus		I*	5.17071	0.81082	109.4	3.02174	0.87539	86.2	2.14692		0.79032	0.639796	1.21421	3.16779	6.04855	2.56								0.412238
Dromaeosauridae		II*	9.63105	1.94453	152.7	5.98794	1.32346	131.5	3.63144		1.47206	1.53438	1.69478	4.95549	13.207	4.67	3.4				0.728051			0.752013	0.547504
YPM-5205		III*	6.54255	1.26731	90.1	3.62141	0.8251	66.2	2.81561	14.656	1	1	1	4.62225	7.26868	6.21	4.08	3.79		14.08	0.657005	0.610306		1	0.657005	0.610306
(Ostrom, 1969)	Left	IV*	5.7325	1.15929	87	3.24054	0.86013	51.7	2.41552		0.876187	0.914764	0.965594	4.16392	6.32264	5.02	3.85	3.23	2.98	15.08	0.766932	0.643426	0.593625	0.808374	0.619968	0.520129	0.479871
Deinonychus		-														x
Dromaeosauridae		II*	10.7137	2.04098	107.5	7.11656	1.69829	87.5	3.80351					6.64255	12.4629	x	x
MCZ-4371		-														x	x	x
(Ostrom, 1976)	Left	-														x	x	x	x
Saurornitholestes		I*	2.90973	0.91391	97.9	1.48588	0.47219	68.7	1.47557					1.92918	3.29634	2.3								0.489362
Dromaeosauridae		II*	7.34997	1.28082	130.9	4.94931	0.95061	122.6	2.42756	11.5				4.04023	9.23044	2.6	2.9			5.5	1.11538			0.553191	0.617021
MOR-660		-														4.7	x	2.8				0.595745		1		0.595745
	?	-														4	x	x	x					0.851064
Saurornitholestes		I*	3.00476	0.91505	104.7	1.58624	0.52724	98.7	1.51109					1.89753	3.46746	x
Dromaeosauridae		II*	7.72857	1.41482	128.4	5.17624	1.07189	114	2.47387					4.29213	9.61867	2.6	x							0.530612
MOR-660		-														4.9	x	x						1
	?	-														x	x	x	x
Saurornitholestes		-														2.53								0.491262
Dromaeosauridae		II*	7.7024	1.33792	109.1	5.45785	1.07249	92.2	2.42634		1.74794	1.46333	1.60914	4.72759	9.00206	2.94	x							0.570874
TMP-XXXX: (MOR cast)		III*	4.40656	0.9143	67.8	2.63515	0.67472	42.2	1.92442		1	1	1	3.95033	4.67456	5.15	x	3.06				0.594175		1		0.594175
	Right	IV*	3.67454	0.89148	90.6	2.09401	0.61966	67.8	1.67116		0.833879	0.975041	1.33628	2.58479	4.08725	4.05	2.95	2.35	2.31	11.66	0.728395	0.580247	0.57037	0.786408	0.572816	0.456311	0.448544
Bambiraptor feinbergi		I*	1.41522	0.33866	84.9	0.89573	0.25586	92.9	0.64259					1.04839	1.55349	1.91								0.62215
Dromaeosauridae		II*	3.6321	0.63343	111.7	2.47105	0.4962	107.1	1.18217					2.19443	4.27812	1.72	1.65			3.37	0.959302			0.560261	0.537459
FIP-001; AMNH FR30556 (MOR cast)		-								8.30422						3.07	1.78	1.65		6.5	0.579805	0.537459		1	0.579805	0.537459
(Burnham et al., 2000; Senter, 2006)	Left	IV*	2.07109	0.39843	81.7	1.24139	0.28843	62	0.80025					1.58321	2.25755	2.33	1.72	1.24	1.23	6.52	0.738197	0.532189	0.527897	0.758958	0.560261	0.403909	0.400651
Bambiraptor feinbergi		I*	1.41947	0.30877	61.4	0.82008	0.21951	63	0.66275		0.647787	0.739569	0.743341	1.39016	1.48974	x
Dromaeosauridae		-														1.60373	1.50583			3.10956	0.938953			0.649057	0.609434
FIP-001; AMNH FR30556 (MOR cast)		III*	2.19126	0.4175	82.6	1.25097	0.28405	57.5	1.00339	8.48157	1	1	1	1.66004	2.39319	2.47086	1.35198	1.46853		5.29138	0.54717	0.59434		1	0.54717	0.59434
(Burnham et al., 2000; Senter, 2006)	Right	IV*	2.09009	0.35368	85.5	1.31223	0.27426	64.1	0.77276		0.95383	0.847138	1.03511	1.53955	2.2974	2.44289	1.82751	1.27739	1.37063	6.91841	0.748092	0.522901	0.561069	0.988679	0.739623	0.516981	0.554717
Velociraptor mongoliensis		I*	2.12356	0.35809	57.3	1.25846	0.2591	61.4	0.83708					2.21454	2.21471	x
Dromaeosauridae		II*	5.56134	0.83192	98.1	3.80856	0.62685	92.3	1.75366					3.68163	6.30357	x	2.42
IGM-100/985		-								8.56						x	2.47	x
(Norell & Makovicky, 1997)	Right	IV*	2.98794	0.52799	57.1									3.12595	3.11527	x	2.1	1.7	1.6
Velociraptor mongoliensis		I*														1.69								0.449468
Dromaeosauridae		II*														2.36	2.4			4.76	1.01695			0.62766	0.638298
IGM-100/985		-								8.62						3.76	2.49	x			0.662234			1	0.662234
(Norell & Makovicky, 1997)	Left	IV*														2.68	2.13	1.68	1.61	8.1	0.794776	0.626866	0.600746	0.712766	0.566489	0.446809	0.428191
Velociraptor mongoliensis		I*			66.3											1.93								0.487374
Dromaeosauridae		II*														2.39	2.61			5	1.09205			0.603535	0.659091
IGM-100/982		III*														3.96	x	x						1
(Norell & Makovicky, 1997)	Left	IV*								8.34						2.71	x	x	x					0.684343
Velociraptor mongoliensis		I*														x
Dromaeosauridae		II*														x	x
IGM-100/986		III*														x	x	x
(Norell & Makovicky, 1997)	Right	IV*														x	x	x	1.96
Velociraptor mongoliensis		I*														x
Dromaeosauridae		II*								9.91						2.66	2.8			5.46	1.05263			0.604545	0.636364
IGM-100/986		III*														4.4	2.74	x			0.622727			1	0.622727
(Norell & Makovicky, 1997)	Left	IV*														3.01	2.3	1.86	1.86	9.03	0.76412	0.61794	0.61794	0.684091	0.522727	0.422727	0.422727
Utahraptor ostrommaysaurus		-														x
Dromaeosauridae		II*	13.3311	2.67617	112.5	8.03049	2.08557	71.6	5.27448					8.01659	15.7405	x	x
CEU-184v.86		-														x	x	x
(Kirkland et al., 1994)	Right	-														x	x	x	x
Cryptovolans pauli		-														x
Dromaeosauridae		II*	1.71577	0.31405	94.5	1.06991	0.28376	58	0.53767		1.33031	1.11742	1.01722	1.16827	1.92687	x	x
LPM-0200	not	III*	1.28975	0.28105	92.9	0.75715	0.23808	64.5	0.4712		1	1	1	0.889761	1.44267	x	x	x
(Czerkas et al. 2002)	specified	IV*	1.12096	0.22554	112	0.72927	0.19664	81.6	0.40507		0.86913	0.802491	1.2056	0.676061	1.32154	x	x	x	x
Pyroraptor olympius		-														x
Dromaeosauridae		II*	5.1575	1.12937	129.9	3.40979	0.90149	100.8	1.69474					2.8465	6.45352	x	x
MNHN BO001		-														x	x	x
(Allain & Taquet, 2000)	Left	-														x	x	x	x
Pyroraptor olympius		-														x
Dromaeosauridae		II*	5.93158	1.10581	116	3.98237	0.80536	97.5	1.95164					3.4972	7.08036	x	x
MNHN BO004		-														x	x	x
(Allain & Taquet, 2000)	Right	-														x	x	x	x
Dromaeosaurus albertensis		-														x
Dromaeosauridae		II*	12.6416	2.14344	110.7	8.93828	1.87402	98.2	4.01109					7.68355	14.8452	x	x
AMNH-5356		-								19.0087						x	x	x
(Colbert & Russell, 1969)	Left	-														x	x	x	x
Rahonavis ostromi		I*														1								0.505051
Dromaeosauridae		II*														1.25	1.16			2.41	0.928			0.631313	0.585859
UA 8656		III*								4.98						1.98	1.31	1.07		4.36	0.661616	0.540404		1	0.661616	0.540404
(Forster et al., 1998)	Left	IV*														1.51	1	0.73	x		0.662252	0.483444		0.762626	0.505051	0.368687
Sinornithosaurus sp.		I*														1.86								0.43662
Dromaeosauridae		II*														2.45	2.68			5.13	1.09388			0.575117	0.629108
IVPP V12811		III*														4.26	3.49	2.65		10.4	0.819249	0.622066		1	0.819249	0.622066
(Xu & Wang, 2004)	Left	IV*														2.97	2.63	1.77	1.81	9.18	0.885522	0.59596	0.609428	0.697183	0.617371	0.415493	0.424883
Microraptor zhaoianus		I*														x
Dromaeosauridae		II*								4.451						0.688	0.724			1.412	1.05233			0.691457	0.727638
CAGS 20-7-004		III*								4.776						0.995	0.774	0.613		2.382	0.777889	0.61608		1	0.777889	0.61608
(Hwang et al., 2002)	Left	IV*								4.68						0.73	0.54	0.501	0.542	2.313	0.739726	0.686301	0.742466	0.733668	0.542714	0.503518	0.544724
Microraptor zhaoianus		I*														0.526
Dromaeosauridae		II*	14.0524	2.98151	90.46					4.589	1.44304	1.53571	1.0195	9.76888	15.416	0.738	x
CAGS 20-8-001		III*	9.73806	1.94145	88.73					4.939	1	1	1	6.91834	10.7088	1.005	0.824	0.788		2.617	0.8199	0.78408		1	0.8199	0.78408
(Hwang et al., 2002)	Left	IV*								4.85						0.814	0.572	0.437	0.566	2.389	0.702703	0.536855	0.695332	0.80995	0.569154	0.434826	0.563184
Microraptor zhaoianus		I*								0.809						0.535
Dromaeosauridae		II*	13.1972	2.7812	100.42						1.48569	1.49174	1.18784	8.7057	15.2542	0.691	0.759			1.45	1.09841			0.709446	0.779261
CAGS 20-8-001		III*	8.8829	1.86441	84.54						1	1	1	6.64869	9.8074	0.974	0.82	0.81		2.604	0.841889	0.831622		1	0.841889	0.831622
(Hwang et al., 2002)	Right	IV*	8.151	1.53313	73.74						0.917606	0.822314	0.87225	6.80277	8.75193	0.839	0.597	0.416	0.59	2.442	0.711561	0.495828	0.703218	0.861396	0.612936	0.427105	0.605749
Sinornithoides youngi		I*	1.07929	0.30876	75.8						0.710274	0.864196	0.83114	0.878493	1.16221	0.74
troodontidae		II*	2.28384	0.56471	108.1	1.35853	0.41258	95.6	0.94943		1.50298	1.58058	1.18531	1.4106	2.66137	1.792	1.028			2.82	0.573661
IVPP-V9612		III*	1.51954	0.35728	91.2	0.93062	0.29884	75.1	0.67729	18.3054	1	1	1	1.0634	1.69266	x	1.94	1.528
(Currie & Dong, 2001)	Left	IV*	1.28744	0.34398	88.8	0.72643	0.26712	56.5	0.56669		0.847256	0.962774	0.973684	0.920042	1.42593	1.412	1.256	1.132	1.312	5.112	0.889518	0.8017	0.929178
Troodon (Stenonychosaurus) inequalis		I*	25.3016	5.98401	73.2	13.2826	3.75763	53.5	12.2931		0.826256	0.642843	0.884058	21.2182	27.1079	x
troodontidae		II*	35.8254	8.86198	103.2	20.068	5.3031	78.5	16.5814		1.16992	0.952014	1.24638	22.8568	41.1691	x	x
NMC-12340		III*	30.622	9.30867	82.8						1	1	1	23.1525	33.4584	x	x	x
(Russell, 1969)	Right	IV*	27.5008	7.51636	75.4	(relative scale)					0.898073	0.807458	0.910628	22.4854	29.5902	x	x	x	x
Troodon (Stenonychosaurus) inequalis		I*														2.9								0.439394
troodontidae		II*														5.05	2.9			7.95	0.574257			0.765152	0.439394
NMC-8589		III*														6.6	4.12	3.93		14.65	0.624242	0.595455		1	0.624242	0.595455
(Russell, 1969)	Right	IV*														3.42	2.83	2.36	2.45	11.06	0.827485	0.690058	0.716374	0.518182	0.428788	0.357576	0.371212
Borogovia gracilicrus		I*														x
?Troodontidae?		II*														2.81	1.13			3.94	0.402135
ZPAL MgD-I/i74		III*														x	2.5	2.16
(Osmolska, 1987)	Right	IV*														1.78	1.63	1.39	1.46	6.26	0.91573	0.780899	0.820225
Archaeopteryx		I*														0.61								0.564815
Avialae		II*														1.06	0.88			1.94	0.830189			0.981481	0.814815
WDC-CSG-100 (Thermopolis)		III*								3.96						1.08	0.96	0.78		2.82	0.888889	0.722222		1	0.888889	0.722222
(Mayr et al, 2007)	Right	IV*														0.75	0.66	0.56	0.56	2.53	0.88	0.746667	0.746667	0.694444	0.611111	0.518519	0.518519
Archaeopteryx		I*														0.71								0.657407
Avialae		II*														0.6	x							0.555556
BSP 1999 I 50 (Munich)	not	III*								4.05						1.08	0.85	0.84		2.77	0.787037	0.777778		1	0.787037	0.777778
(Mayr et al, 2007)	specified	IV*														0.8	0.6	0.55	x		0.75	0.6875		0.740741	0.555556	0.509259
Archaeopteryx		I*														0.55
Avialae		II*														0.82	0.7			1.52	0.853659			0.854167	0.729167
HMN MB 1880/81 (Berlin)	not	III*								3.7						0.96	0.9	0.82		2.68	0.9375	0.854167		1	0.9375	0.854167
(Mayr et al, 2007)	specified	IV*														0.7	0.66	0.49	0.58	2.43	0.942857	0.7	0.828571	0.729167	0.6875	0.510417	0.604167
Archaeopteryx		I*														x
Avialae		II*														0.95	1			1.95	1.05263			0.863636	0.909091
Lost (Maxberg)	not	III*								4.2						1.1	1.05	x			0.954545			1	0.954545
(Mayr et al, 2007)	specified	IV*														x	x	x	x
Archaeopteryx		I*														0.88								0.692913
Avialae		II*														1.1	1.1			2.2	1			0.866142	0.866142
BMNH 37001 (London)	not	III*								4.4						1.27	1.1	0.95		3.32	0.866142	0.748031		1	0.866142	0.748031
(Mayr et al, 2007)	specified	IV*														x	x	x	x
Archaeopteryx		I*														1.1								0.80292
Avialae		II*														1.2	1.25			2.45	1.04167			0.875912	0.912409
Uncatalogued (Solnhofen)	not	III*								4.75						1.37	1.18	1.05		3.6	0.861314	0.766423		1	0.861314	0.766423
(Mayr et al, 2007)	specified	IV*														1	0.85	x	0.95		0.85		0.95	0.729927	0.620438		0.693431
Archaeopteryx		I*														5.5								0.611111
Avialae		II*														7.1	7			14.1	0.985915			0.788889	0.777778
JM SoS 2257 (Eichstatt)	not	III*								3.02						9	8	7		24	0.888889	0.777778		1	0.888889	0.777778
(Mayr et al, 2007)	specified	IV*														6.1	5	4.6	4.9	20.6	0.819672	0.754098	0.803279	0.677778	0.555556	0.511111	0.544444
Epidendrosaurus (Scansoriopteryx)		I*														0.275								1.1
Avialae		II*														0.275	0.28			0.555	1.01818			1.1	1.12
CAGS02-IG-gausa-1/DM607		III*														0.25	0.2	0.25		0.555	0.8	1		1	0.8	1
(Czerkas & Yuan, 2002)		IV*														0.2	0.125	0.11	0.2	0.7	0.625	0.55	1	0.8	0.5	0.44	0.8
Kol ghuva		I*								1.7						2.17
Alvarezsauridae		II*								20.35						4.4	2.99			7.39	0.679545			1.01852	0.69213
IGM 100/2011		III*								10.9						4.32	3.12	2.4		9.84	0.722222	0.555556		1	0.722222	0.555556
(Turner et al., 2009)	Left	IV*								20.81						2.3	2.03	1.6	1.12	7.05	0.882609	0.695652	0.486957	0.532407	0.469907	0.37037	0.259259
Avimimus		I*														x
Oviraptorosauria		II*														1.47	0.93			2.4	0.632653			0.615063	0.389121
PIN 3907-1		III*														2.39	1.62	1.19		5.2	0.677824	0.497908		1	0.677824	0.497908
(Kurzanov, 1987)	Left	IV*														1.1	0.63	0.5	0.5	2.73	0.572727	0.454545	0.454545	0.460251	0.263598	0.209205	0.209205
Tanycolagreus topwilsoni		I*	3.48309	0.97674	59.5						0.631243	0.780443	0.980231	3.50965	3.64467	3.85								0.552286
Tyrannosauroidea		II*	4.22489	1.05291	52.5						0.76568	0.841305	0.864909	4.77617	4.37639	6.33889	4.91659			11.2555	0.775623			0.90932	0.70529
TPII-2000-09-29		III*	5.51783	1.25152	60.7	2.92517	0.85932	41	2.44729	21.1862	1	1	1	5.46016	5.78458	6.97103	5.15364	3.76646		15.8911	0.739295	0.540302		1	0.739295	0.540302
(Carpenter et al., 2005)	Right	IV*	4.14564	1.08301	49.5	1.8655	0.71601	54.4	2.0588		0.751317	0.865356	0.815486	4.95109	4.27743	4.77612	3.41528	2.68657	2.08955	12.9675	0.715074	0.5625	0.4375	0.685139	0.489924	0.38539	0.299748
Tyrannosaurus rex		I*	14.8625	4.4034	94.1	10.5631	3.63621	68.6	5.59607		0.850447	0.932081	1.08037	10.1527	16.6743	x
Tyrannosauridae		II*	19.4567	5.95454	98.6	10.1404	3.94185	49.4	9.79855		1.11333	1.26041	1.13203	12.832	22.0825	20.7	15.2			35.9	0.7343			1.02985	0.756219
FMNH-PR2081		III*	17.4761	4.72427	87.1	9.48386	3.12611	48.1	8.18007		1	1	1	12.6825	19.2796	20.1	13.6	12.2		45.9	0.676617	0.606965		1	0.676617	0.606965
(Brochu, 2003)	Right	-														15.4	11.1	8.8	x		0.720779	0.571429		0.766169	0.552239	0.437811
Allosaurus fragilis		I*	8.89141	2.81977	71.1	5.39598	2.18076	60.1	4.01617		0.660394		0.764516	7.64638	9.48861	7.19512								0.564593
Allosauroidea		II*	14.3644	4.13915	108.8						1.06689		1.16989	8.8331	16.7733	11.5244	9.35976			20.8841	0.812169			0.904306	0.73445
not specified		III*	13.4638		93					32.933	1		1	9.28059	15.0638	12.7439	8.75	6.21951		27.7134	0.686603	0.488038		1	0.686603	0.488038
(Madsen, 1976)	Left	IV*	9.5747	3.1544	81.4	5.32038	2.46539	35	4.48272		0.711144		0.875269	7.34145	10.43	8.20122	5.85366	4.60366	3.65854	22.3171	0.713755	0.561338	0.446097	0.643541	0.45933	0.361244	0.287081
Sinraptor dongi		I*														x
Allosauroidea		II*														13.41	10.59			24	0.789709			0.975983	0.770742
IVPP 10600		III*														13.74	9.89	7.32		30.95	0.719796	0.532751		1	0.719796	0.532751
(Currie & Xhao, 1993)	Right	IV*														10.05	8.01		x		0.797015			0.731441	0.582969
Garudimimus brevipes		I*														3.5								0.59322
Ornithomimidae		II*														6.3					0			1.0678	0
GIN 100/13		III*								22.9						5.9	4.5	x			0.762712			1	0.762712
(Kobayashi & Barsbold, 2005)	Left	IV*														4.3	3.5	2.8	2.7	13.3	0.813953	0.651163	0.627907	0.728814	0.59322	0.474576	0.457627
Gallimimus bullatus		-														x
Ornithomimidae		II*														4.5	2.3				0.511111			1.02273	0.522727
Z.Pal.No.Mg.D-I/94		III*								22						4.4	3.5	2.4		10.3	0.795455	0.545455		1	0.795455	0.545455
(Osmolska et al., 1972)	Right	IV*														2.6	1.9	1.7	1.2	7.4	0.730769	0.653846	0.461538	0.590909	0.431818	0.386364	0.272727
Gallimimus bullatus		-														x
Ornithomimidae		II*														7.2	3.5			10.7	0.486111			1.10769	0.538462
Z.Pal.No.Mg.D-I/32	not	III*														6.5	5	3.4		14.9	0.769231	0.523077		1	0.769231	0.523077
(Osmolska et al., 1972)	specified	IV*														4.4	3.3	2.2	2	11.9	0.75	0.5	0.454545	0.676923	0.507692	0.338462	0.307692
Gallimimus bullatus		-														x
Ornithomimidae		II*														x	3.3								0.52381
Z.Pal.No.Mg.D-I/24		III*														6.3	5	3.5		14.8	0.793651	0.555556		1	0.793651	0.555556
(Osmolska et al., 1972)	Left	IV*								32						4	2.7	1.8	x		0.675	0.45	#VALUE!	0.634921	0.428571	0.285714
Gallimimus bullatus		-														x
Ornithomimidae		II*														3.2	1.5			4.7	0.46875			1.03226	0.483871
G.I.No. DPS 100/10	not	III*								15.7						3.1	2.4	x			0.774194			1	0.774194
(Osmolska et al., 1972)	specified	IV*														1.8	1.3	1	0.9	5	0.722222	0.555556	0.5	0.580645	0.419355	0.322581	0.290323
Gallimimus bullatus		-														x
Ornithomimidae		II*														10.2	5.2			15.4	0.509804			1.13333	0.577778
G.I.No. DPS 100/11		III*								53						9	7	5		21	0.777778	0.555556		1	0.777778	0.555556
(Osmolska et al., 1972)	Right	IV*														6.2	4.3	3.2	3	16.7	0.693548	0.516129	0.483871	0.688889	0.477778	0.355556	0.333333
Ornithomimus velox		-														x
Ornithomimidae		II*														7.6	3.4			11	0.447368			1.07042	0.478873
MNA Pl.1762		III*														7.1	5.4	6.1		18.6	0.760563	0.859155		1	0.760563	0.859155
(DeCourten & Russell, 1985)	Left	IV*														4.6	2.6	1.8	1.9	10.9	0.565217	0.391304	0.413043	0.647887	0.366197	0.253521	0.267606
Struthiomimus altus		I*														x
Ornithomimidae		II*														9.2	4.8			14	0.521739			1.10843	0.578313
UCMZ (VP) 1980.1		III*														8.3	6.4	5.2		19.9	0.771084	0.626506		1	0.771084	0.626506
(Nicholls & Russell, 1981)	Right	IV*														4.6	3.2	2.5	2.6	12.9	0.695652	0.543478	0.565217	0.554217	0.385542	0.301205	0.313253
Struthiomimus altus		I*														x
Ornithomimidae		II*														8.5	3.5			12	0.411765			1.08974	0.448718
AMNH 5339		III*														7.8	5.4	3.9		17.1	0.692308	0.5		1	0.692308	0.5
(Nicholls & Russell, 1981)	Left	IV*														4.7	2.6	1.9	1.8	11	0.553191	0.404255	0.382979	0.602564	0.333333	0.24359	0.230769
c.f. Ornithomimus sp.		I*														x
Ornithomimidae		II*								37.6						11.075	6.438			17.513	0.581309			1.07733	0.626265
UCMP 154569		III*								41.3						10.28	8.533	6.587		25.4	0.830058	0.640759		1	0.830058	0.640759
	Right	IV*								40.3						6.087	5.159	3.913	3.723	18.882	0.847544	0.642845	0.611631	0.592121	0.501848	0.380642	0.36216
Dilophosaurus wetherilli		I*														6.8
Ceratosauridae		II*														10.3	7.9			18.2	0.76699			0.936364	0.718182
UCMP 37302		III*														11	8.4	7		26.4	0.763636	0.636364		1	0.763636	0.636364
(Welles, 1984)	Left	IV*														7.2	5.7	4.6	4.5	22	0.791667	0.638889	0.625	0.654545	0.518182	0.418182	0.409091
Table S1 legend
Ungual measurements (A, Hm, O, Hp) after Fowler et al (2009)
* on digit number denotes ungual measured without keratin sheath (ie. all fossil taxa, some extant taxa)
ALo: outer Arc Length: Distance around the circumference of the circle formed (in part) by the curvature of the claw/ungual. This is the best indication of claw "size".
D-x-1 length: Length of non-ungual phalanx 1 of pedal digit x (left axis: I-IV). Othered numbered digits in same format
Combined length: Sum of non ungual phalanx lengths, if all present
Phalanx size relative to D-x-1: Phalanx length divided by length of phalanx 1 on the same digit. -cursorial taxa have relatively long proximal phalanges, and short distal phalanges -graspers have relatively longer distal phalanges
Phalanx size relative to D-III-1: Phalanx length divided by length of phalanx 1 on digit III. -gives some indication of the relative size of the phalanx
AMNH: American Museum of Natural History, New York
BMNH: Natural History Museum, London
BSP: Bayerische Staatssammlung für Paläontologie und Historische Geologie, München, Germany
CAGS: China Academy of Geological Sciences
CEU: College of Eastern Utah, Price, Utah
FIP: Florida Institute of Paleontology, Dania Beach
FMNH: Field Museum of Natural History, Chicago
GIN: Paleontological Center of Mongolia, Ulaan Bataar, Mongolia
HMN MB: Museum Fur Naturkunde, Berlin
IGM: Mongolian Institute of Geology, Ulaanbaatar, Mongolia
IVPP: Institute of Vertebrate Paleontology and Paleoanthropology, Beijing, China
JM SoS: Jura Museum Eichstatt, Germany
LPM: Liaoning Paleontological Museum
MCZ: Museum of Comparative Zoology, Harvard University, Cambridge, Massachusetts
MNA: Museum of Northern Arizona, Flagstaff
MNHN: Museum National d’Histoire Naturelle, Paris, France
MOR: Museum of the Rockies, Bozeman, Montana
MOR-OST: Osteology collection, Museum of the Rockies, Montana State University, Bozeman, Montana
MSU-ECO: Dept. of Ecology, Montana State University, Bozeman, Montana
MSU-GEO: Dept. of Geology, Montana State University, Bozeman, Montana
NMC: National Museum of Canada, Ottawa
PIN: Paleontological Institute, Russian Academy of Sciences, Moscow
TMP: Royal Tyrrell Museum of Palaeontology, Drumheller, Alberta, Canada
TPII: Thanksgiving Point Institute Inc. (North American Museum of Ancient Life), Lehi, Utah
UA: Universite d'Antananarivo, Madagascar
UCMP: University of California Museum of Paleontology, Berkeley
WDC: Wyoming Dinosaur Center, Thermopolis, Wyoming
YPM: Peabody Museum of Natural History, Yale University, New Haven, Connecticut.
ZPAL: Palaeozoological Institute of the Polish Academy of Sciences, Warsaw
References
Allain, R., and Taquet, P. 2000. A new genus of Dromaeosauridae (Dinosauria, Theropoda) from the Upper Cretaceous of France. J. Vert. Paleontol. 20: 404–407.
Burnham, D. A., Derstler, K. L., Currie, P. J., Bakker, R. T., Zhou, Z., and Ostrom, J. H. 2000. Remarkable new birdlike dinosaur (Theropoda: Manirpatora) from the Upper Cretaceous of Montana. Paleontol. Contrib. U. Kansas 13: 1-14.
Brochu, C. 2003. Osteology of Tyrannosaurus rex: Insights from a nearly complete skeleton and high-resolution computed tomographic analysis of the skull. Mem. Soc. Vert. Paleontol. 7: 1–138.
Carpenter, K., C. Miles, and K. Cloward. 2005. New small theropod from the Upper Jurassic Morrison Formation of Wyoming; pp. 23-48 in K. Carpenter (ed.), The Carnivorous Dinosaurs. Indiana University Press, Bloomington IN.
Colbert, E. H., and Russell, D. A. 1969. The small Cretaceous dinosaur Dromaeosaurus. Am. Mus. Novit. 2380: 1–49
Currie, P. J., and Z. Dong. 2001. New information on Cretaceous troodontids (Dinosauria, Theropoda) from the People's Republic of China. Can. J. Earth Sci. 38: 1753-1766.
Currie, P. J., and Zhao X.-J. 1993. A new carnosaur (Dinosauria, Theropoda) from the Jurassic of Xinjiang, People’s Republic of China. Can. J. Earth Sci. 30: 2037-2081.
Czerkas, S. A., and Yuan C. 2002. An arboreal maniraptoran from northeast China. Dino. Mus. J. 1: 63–95.
Czerkas, S. A., Zhang, D., Li, J., and Li, Y. 2002. Flying dromaeosaurs. Dino. Mus. J. 1: 98-126.
DeCourten, F. L., and Russell, D. A. 1985. A specimen of Ornithomimus velox (Theropoda, Ornithomimidae) from the terminal Cretaceous Kaiparowits Formation of southern Utah. J. Paleontol. 59: 1091–1099.
Forster, C. A., S. D. Sampson, L. M. Chiappe, and D. W. Krause. 1998. The theropod ancestry of birds: New evidence from the Late Cretaceous of Madagascar. Science 279:1915-1919.
Fowler, D. W., E. A. Freedman, and J. B. Scannella. 2009. Predatory Functional Morphology in Raptors: Interdigital Variation in Talon Size Is Related to Prey Restraint and Immobilisation Technique. PLoS ONE 4(11): e7999. doi:10.1371/journal.pone.0007999
Hwang, S. H., Norell, M. A., Ji, Q., and Gao, K. 2002. new specimens of Microraptor zhaoianus (Theropoda: Dromaeosauridae) from Northeastern China. Am. Mus. Novitates 3381: 1-44.
Kirkland, J. I., D. Burge, and R. Gaston. 1993. A large dromaeosaur (Theropoda) from the Lower Cretaceous of eastern Utah. Hunteria 2 (10): 1–16.
Kobayashi, Y. and Barsbold, R. 2005. Reexamination of a primitive ornithomimosaur, Garudimimus brevipes Barsbold, 1981 (Dinosauria: Theropoda), from the Late Cretaceous of Mongolia. Can. J. Earth Sci. 42: 1501–1521
Kurzanov, S. M. 1987. [Avimimids and the problem of the origin of birds]. Trudy Sovm. Sov.-Mong. Paleontol. Eksped. 31:5-95. (In Russian.)
Madsen, J. H. 1976. Allosaurus fragilis: A revised osteology. Utah Geol. Min. Surv. Bull. 109: 1–163.
Mayr, G., B. Pohl, S. Hartman, and D. S. Peters. 2007. The tenth skeletal specimen of Archaeopteryx. Zool. J. Linn. Soc. 149: 97-116.
Nicholls, E. L., and Russell, A. P. 1981. A new specimen of Struthiomimus altus from Alberta, with comments on the classificatory characters of Upper Cretaceous ornithomimids. Can. J. Earth Sci. 18: 518–526.
Norell, M. A., and P. J. Makovicky. 1997. Important features of the dromaeosaur skeleton: Information from a new specimen. Am. Mus. Novitates 3215: 1-28.
Osmólska, H. 1987. Borogovia gracilicrus gen. et sp. n., a new troodontid dinosaur from the Late Cretaceous of Mongolia. Acta Palaeontol. Polonica 31: 133–150.
Ostrom, J. H. 1976. On a new specimen of the Lower Cretaceous theropod dinosaur Deinonychus antirrhopus. Breviora 439:1-21.
Ostrom, J. H. 1969. Osteology of Deinonychus antirrhopus, an unusual theropod from the Lower Cretaceous of Montana. Bull. Peabody Mus. Nat. Hist. 30: 1-165.
Russell, D.A. 1969. A new specimen of Stenonychosaurus from the Oldman Formation (Cretaceous) of Alberta. Can. J. Earth Sci. 6: 595-612
Senter, P. 2006. Comparison of forelimb function betwen Deinonychus and Bambiraptor (Theropoda: Dromaeosauridae). J. Vert Paleontol. 26: 897-906.
Turner, A. H., S. J. Nesbitt, and M. A. Norell. 2009. A large alvarezsaurid from the Late Cretaceous of Mongolia. American Museum Novitates 3648:1-14.
Welles, S. P. 1984. Dilophosaurus wetherilli (Dinosauria, Theropoda). Osteology and comparisons. Palaeontographica Abt. A 185: 85–180.
Xu, X., and Wang, X.-L. 2000. Troodontid-like pes in the dromaeosaurid Sinornithosaurus. Palont. Soc. Korea. Special Publication 4: 179-188.
Table S2: Extant bird data from Fowler et al. (2009)
Specimen		Digit	Outer curvature			Inner curvature			Other			Outer, ratio to D-III					Inner, ratio to D-III					ALo ratio	Toe ratio	Outer, ratio to D-IV			Inner, ratio to D-IV			ALo ratio	Toe ratio	ALo / Toe	ALo /
			Ao	Hmo	Oo	Ai	Hmi	Oi	Hp	Toe	MT	Ao	Hmo	Oo	radius	ALo	Ai	Hmi	Oi	radius	ALi	to D-III	to D-III	Ao	Hmo	Oo	Ai	Hmi	Oi	to D-IV	to D-IV		D-III Toe
Pandion haliaetus	Male	I	2.94235	0.4722	156.7	2.08429	0.40396	142.4	0.73419	2.16	4.27	1.09906	1.06086	0.923394	1.50212	4.10819	1.05708	1.04068	0.87847	1.10088	2.73606	1.03203	0.567227	1.01841	0.98373	0.917985	0.958876	0.944759	0.892231	0.951404	0.81203	1.90194	1.07883
Osprey	Immature	II	2.64867	0.44167	166.9	1.9773	0.39485	159.4	0.67832	2.015		0.989366	0.992272	0.9835	1.33304	3.88307	1.00282	1.01721	0.983344	1.00484	2.79553	0.97548	0.529149	0.916758	0.920127	0.977739	0.909656	0.923453	0.998747	0.899269	0.757519	1.92708	1.01971
MOR OST-1268	1200 g	III	2.67714	0.44511	169.7	1.97174	0.38817	162.1	0.6722	3.808		1	1	1	1.344	3.98068	1	1	1	0.998021	2.82358	1	1	0.926612	0.927293	0.994142	0.907098	0.90783	1.01566	0.921873	1.43158	1.04535	1.04535
		IV	2.88917	0.48001	170.7	2.17368	0.42758	159.6	0.7121	2.66		1.0792	1.07841	1.00589	1.44936	4.31803	1.10242	1.10153	0.984577	1.10429	3.07606	1.08475	0.698529	1	1	1	1	1	1	1	1	1.62332	1.13394
Accipiter gentilis	Female	I	3.19675	0.43375	145.2	2.46892	0.38439	132.4	0.68599	2.253	7.276	1.51526	1.17525	1.13704	1.67502	4.24487	1.64118	1.15836	1.34964	1.3492	3.11774	1.62073	0.573867	1.82042	1.35437	1.11521	1.96579	1.42907	1.24086	1.92974	0.731494	1.8841	1.08122
Goshawk	Immature	II	3.10251	0.45485	145.2	2.28258	0.37212	127.8	0.68011	2.391		1.47059	1.23242	1.13704	1.62564	4.11974	1.51731	1.12138	1.30275	1.27089	2.83475	1.57295	0.609017	1.76675	1.42025	1.11521	1.81743	1.38345	1.19775	1.87285	0.776299	1.72302	1.04935
MOR OST-1271	1030 g	III	2.1097	0.36907	127.7	1.50436	0.33184	98.1	0.57642	3.926		1	1	1	1.17513	2.61912	1	1	1	0.995893	1.70514	1	1	1.20139	1.15241	0.980799	1.1978	1.2337	0.9194	1.19066	1.27468	0.667121	0.667121
	Right	IV	1.75605	0.32026	130.2	1.25594	0.26898	106.7	0.48534	3.08		0.83237	0.867749	1.01958	0.968007	2.19972	0.834867	0.810571	1.08767	0.782715	1.45762	0.839869	0.784513	1	1	1	1	1	1	1	1	0.714194	0.560295
Accipiter gentilis	Adult	I	2.74779	0.38656	138.3	2.10622	0.36109	121.2	0.58714	1.851	6.785	1.68051	1.26405	1.30349	1.47017	3.54868	1.60405	1.33219	1.55186	1.20878	2.55699	1.84147	0.48621	1.87861	1.46214	1.03907	1.97406	1.54928	1.20238	1.91627	0.687082	1.91717	0.932146
Goshawk	Female	II	2.70486	0.39666	131.8	2.20805	0.37476	119.8	0.54423	2.079		1.62619	1.29708	1.24222	1.48157	3.40813	1.68161	1.38262	1.53393	1.27611	2.66822	1.76854	0.546099	1.84926	1.50034	0.990233	2.0695	1.60793	1.18849	1.84037	0.771715	1.63931	0.895226
MOR OST-1276	840 g	III	1.66331	0.30581	106.1	1.31306	0.27105	78.1	0.42074	3.807		1	1	1	1.04066	1.92709	1	1	1	1.04211	1.42051	1	1	1.13717	1.15671	0.797145	1.23067	1.16296	0.774802	1.04062	1.41314	0.506196	0.506196
	Left	IV	1.46267	0.26438	133.1	1.06695	0.23307	100.8	0.41347	2.694		0.879373	0.864524	1.25448	0.797176	1.85187	0.812568	0.859878	1.29065	0.692363	1.21807	0.960965	0.707644	1	1	1	1	1	1	1	1	0.687404	0.486437
Accipiter cooperii	-	I	2.30708	0.3503	134.2	1.84881	0.30197	115.8	0.47677	1.58	6.056	1.42506	1.26572	1.15094	1.25223	2.93302	1.36735	1.23112	1.2385	1.09123	2.20548	1.51486	0.436947	1.72493	1.44543	1.25891	1.87108	1.50526	1.47893	1.89005	0.644372	1.85634	0.811124
Cooper's hawk	-	II	2.25352	0.34288	132	1.73812	0.3042	112.3	0.49891	1.91		1.39197	1.23891	1.13208	1.23339	2.84153	1.28549	1.24022	1.20107	1.04643	2.05101	1.4676	0.528208	1.68489	1.41481	1.23827	1.75905	1.51638	1.43423	1.83109	0.778956	1.48771	0.785822
MOR OST-1280	420 g	III	1.61894	0.27676	116.6	1.35211	0.24528	93.5	0.33244	3.616		1	1	1	0.95141	1.93617	1	1	1	0.928174	1.51467	1	1	1.21043	1.14198	1.09381	1.36839	1.22267	1.19413	1.24767	1.47471	0.535445	0.535445
	Left	IV	1.33749	0.24235	106.6	0.9881	0.20061	78.3	0.33928	2.452		0.826152	0.875668	0.914237	0.83408	1.55182	0.730784	0.817882	0.837433	0.782526	1.06939	0.801491	0.678097	1	1	1	1	1	1	1	1	0.632881	0.429155
Accipiter striatus	-	I	1.50015	0.19615	122	1.15119	0.17634	110.3	0.33106	1.278	5.145	1.43633	1.25729	1.07018	0.857601	1.82609	1.37673	1.31225	1.20153	0.701388	1.35024	1.47395	0.365247	1.58855	1.41196	1.07584	1.76503	1.59295	1.26491	1.63319	0.537201	1.42887	0.52189
Sharp shinned hawk	-	II	1.47849	0.19775	117.9	1.10413	0.18415	107.5	0.36831	1.573		1.4156	1.26755	1.03421	0.862881	1.77559	1.32045	1.37037	1.17102	0.684567	1.2844	1.43318	0.449557	1.56562	1.42348	1.03968	1.69288	1.6635	1.2328	1.58802	0.661202	1.12879	0.507456
MOR OST-1272	-	III	1.04443	0.15601	114	0.83618	0.13438	91.8	0.2168	3.499		1	1	1	0.62267	1.23891	1	1	1	0.582196	0.932801	1	1	1.10598	1.12302	1.00529	1.28205	1.21391	1.05275	1.10803	1.47079	0.354076	0.354076
	Right	IV	0.94435	0.13892	113.4	0.65222	0.1107	87.2	0.21801	2.379		0.904177	0.890456	0.994737	0.564933	1.11812	0.78	0.823783	0.949891	0.472884	0.719695	0.9025	0.679909	1	1	1	1	1	1	1	1	0.469995	0.319553
Accipiter striatus	-	I	1.56187	0.24024	135.9	1.21116	0.21271	116.4	0.35096	1.208	5.138	1.39721	1.54257	1.10668	0.842563	1.99848	1.43275	1.63447	1.08989	0.712537	1.44756	1.46472	0.356763	1.64624	1.76517	1.11302	1.67059	1.76993	1.08887	1.72987	0.553621	1.65437	0.590218
Sharp shinned hawk	Female	II	1.50821	0.2366	127.5	1.15225	0.19412	113.8	0.36187	1.433		1.34921	1.5192	1.03827	0.840816	1.87106	1.36306	1.49162	1.06554	0.687731	1.36596	1.37134	0.423213	1.58968	1.73843	1.04423	1.58933	1.61524	1.06455	1.61958	0.656737	1.3057	0.552588
MOR OST-1278	150 g	III	1.11785	0.15574	122.8	0.84534	0.13014	106.8	0.22044	3.386		1	1	1	0.636601	1.3644	1	1	1	0.526483	0.981371	1	1	1.17823	1.14431	1.00573	1.166	1.08288	0.999065	1.18102	1.55179	0.402955	0.402955
	Left	IV	0.94875	0.1361	122.1	0.72499	0.12018	106.9	0.22841	2.182		0.848727	0.873892	0.9943	0.542117	1.15528	0.857631	0.923467	1.00094	0.451236	0.841897	0.846725	0.644418	1	1	1	1	1	1	1	1	0.529457	0.341192
Harpia harpyja	-	I	6.70956	0.98681	114.8	4.65614	0.76683	92.7	2.12217	4.80158	13.7864	1.93614	1.55914	1.12439	3.98216	7.97881	2.07955	1.61509	1.13742	3.21748	5.20562	2.00963	0.567161	2.45953	1.88776	1.06494	2.69121	1.99316	0.957645	2.5121	0.826013	1.6617	0.942454
Harpy eagle	-	II	5.11599	0.96097	108.9	3.43358	0.73228	96.7	1.91683	5.57182		1.47629	1.51831	1.0666	3.14401	5.97571	1.53353	1.54232	1.1865	2.29757	3.87769	1.50511	0.658142	1.87538	1.83833	1.0102	1.98458	1.90336	0.998967	1.88143	0.958517	1.07249	0.705849
AMNH-1383	-	III	3.46544	0.63292	102.1	2.23901	0.47479	81.5	1.23937	8.46599		1	1	1	2.22802	3.97029	1	1	1	1.71503	2.43954	1	1	1.27033	1.21077	0.947124	1.29413	1.23409	0.841942	1.25003	1.4564	0.468969	0.468969
	Left	IV	2.72798	0.52274	107.8	1.73013	0.38473	96.8	0.99354	5.81296		0.787196	0.825918	1.05583	1.68813	3.17615	0.772721	0.810316	1.18773	1.15682	1.95442	0.79998	0.686625	1	1	1	1	1	1	1	1	0.546392	0.375166
Haliaeetus leucocephalus	-	I	3.68444	0.68843	158.9	2.74944	0.6102	139	0.88878	3.043	9.465	1.03185	1.14507	1.17269	1.8739	5.19693	0.986973	1.08278	1.18197	1.46766	3.56056	1.1392	0.479364	1.31997	1.29183	1.14234	1.29714	1.21443	1.20451	1.43712	0.714487	1.70783	0.818672
Bald eagle	-	II	3.79069	0.73118	157.2	2.82262	0.61601	142.8	0.9714	3.886		1.06161	1.21618	1.16015	1.93349	5.30484	1.01324	1.09309	1.21429	1.48909	3.7113	1.16286	0.612161	1.35803	1.37205	1.13012	1.33167	1.22599	1.23744	1.46696	0.912421	1.36511	0.83567
MSU ECO-4685	-	III	3.57071	0.60121	135.5	2.78573	0.56355	117.6	0.84647	6.348		1	1	1	1.92899	4.5619	1	1	1	1.62839	3.34228	1	1	1.27922	1.12816	0.974119	1.31427	1.12158	1.01906	1.26151	1.49049	0.718636	0.718636
	Left	IV	2.79131	0.53291	139.1	2.11961	0.50246	115.4	0.70463	4.259		0.781724	0.886396	1.02657	1.48953	3.61621	0.760881	0.891598	0.981293	1.25382	2.52533	0.792698	0.67092	1	1	1	1	1	1	1	1	0.849074	0.569661
Haliaeetus leucocephalus	-	I	4.09007	0.74579	159.3	3.12482	0.64234	139.2	0.99535	3.38	9.513	1.18232	1.26221	1.18615	2.07886	5.77988	1.13769	1.15906	1.2286	1.66696	4.04987	1.31373	0.55702	1.50014	1.43695	1.12025	1.50949	1.41519	1.15807	1.61623	0.788062	1.71002	0.952518
Bald eagle	-	II	3.56554	0.69581	144.8	2.79078	0.62334	121.3	0.83311	4.258		1.0307	1.17762	1.07818	1.87032	4.72674	1.01607	1.12478	1.07061	1.60088	3.38919	1.07436	0.701714	1.30776	1.34065	1.01828	1.34813	1.37333	1.00915	1.32174	0.992772	1.11008	0.778961
MSU ECO-4685	-	III	3.45935	0.59086	134.3	2.74663	0.55419	113.3	0.71861	6.068		1	1	1	1.87697	4.39958	1	1	1	1.64404	3.25103	1	1	1.26881	1.13844	0.944444	1.3268	1.22098	0.942596	1.23026	1.41478	0.725046	0.725046
	Right	IV	2.72645	0.51901	142.2	2.07011	0.45389	120.2	0.64919	4.289		0.788139	0.878398	1.05882	1.44091	3.57614	0.753691	0.819015	1.0609	1.19398	2.50483	0.812837	0.706823	1	1	1	1	1	1	1	1	0.833793	0.589344
Aquila chrysaetos	-	I	5.32414	0.8006	138	4.08626	0.7386	121.5	1.13583	4.48206		1.555	1.45373	1.07728	2.85146	6.8679	1.57844	1.43284	1.11264	2.34171	4.96577	1.61344	0.715927	1.93292	1.53944	1.05747	2.12791	1.5743	1.24872	1.98832	1.13728	1.53231	1.09702
Golden eagle	-	II	4.59371	0.72473	134.1	3.55227	0.66922	121.5	1.11985	4.04622		1.34166	1.31597	1.04684	2.49429	5.83785	1.37217	1.29825	1.11264	2.03569	4.31684	1.37145	0.646309	1.66774	1.39355	1.02759	1.84983	1.42642	1.24872	1.69011	1.02669	1.44279	0.932489
MSU ECO-4666	-	III	3.42389	0.55072	128.1	2.5888	0.51548	109.2	0.81078	6.2605		1	1	1	1.9039	4.25668	1	1	1	1.58797	3.02651	1	1	1.24304	1.05895	0.981609	1.34811	1.09873	1.1223	1.23235	1.58855	0.679927	0.679927
	Left	IV	2.75445	0.52006	130.5	1.92032	0.46916	97.3	0.81293	3.94102		0.80448	0.944327	1.01874	1.51653	3.45413	0.74178	0.910142	0.891026	1.27904	2.17207	0.81146	0.629506	1	1	1	1	1	1	1	1	0.876455	0.551734
Aquila chrysaetos	-	I	4.78092	0.6889	104.9	3.20076	0.57491	89.2	1.43139	4.25941	10.1124	1.64665	1.32331	1.10771	3.01513	5.52025	1.68793	1.40027	1.09314	2.27925	3.54841	1.69215	0.669823	2.04029	1.51058	1.00865	2.44896	1.64575	1.13054	2.04546	0.998156	1.29601	0.868099
Golden eagle	-	II	4.03734	0.66759	105.6	2.71739	0.53595	87.3	1.37202	4.52326		1.39055	1.28237	1.1151	2.53433	4.67094	1.43303	1.30538	1.06985	1.96841	2.99921	1.4318	0.711315	1.72297	1.46385	1.01538	2.07912	1.53422	1.10646	1.73076	1.05999	1.03265	0.734539
AMNH-GE-50	-	III	2.90342	0.52059	94.7	1.89626	0.41057	81.6	1.06934	6.35901		1	1	1	1.97376	3.26228	1	1	1	1.45103	2.06653	1	1	1.23906	1.14152	0.910577	1.45086	1.17531	1.03422	1.2088	1.49018	0.513017	0.513017
	Left	IV	2.34325	0.45605	104	1.30699	0.34933	78.9	0.94667	4.26728		0.807065	0.876025	1.0982	1.48681	2.69878	0.689246	0.850842	0.966912	1.02847	1.41627	0.827268	0.67106	1	1	1	1	1	1	1	1	0.632435	0.424402
Buteo jamaicensis	-	I	3.14426	0.43882	140.7	2.53873	0.41641	119.7	0.57857	1.756	7.897	1.30566	1.22384	1.34512	1.66935	4.09938	1.33268	1.3036	1.3951	1.46796	3.0668	1.47553	0.461134	1.65425	1.25946	1.17839	1.7657	1.42513	1.214	1.78714	0.618092	2.3345	1.07652
Red-tailed hawk	-	II	2.93011	0.47538	123.3	2.37435	0.44986	105.3	0.66327	2.476		1.21673	1.3258	1.17878	1.66472	3.58245	1.24639	1.40832	1.22727	1.49341	2.74463	1.28947	0.65021	1.54158	1.36439	1.03266	1.65138	1.53961	1.06795	1.56178	0.871524	1.44687	0.94077
MOR OST-1275	-	III	2.40818	0.35856	104.6	1.90498	0.31943	85.8	0.56248	3.808		1	1	1	1.52181	2.77823	1	1	1	1.39924	2.09535	1	1	1.26698	1.0291	0.876047	1.32493	1.09323	0.870183	1.21118	1.34037	0.729578	0.729578
	Left	IV	1.90072	0.34842	119.4	1.4378	0.29219	98.6	0.50318	2.841		0.789277	0.97172	1.14149	1.10072	2.29382	0.754759	0.914723	1.14918	0.948249	1.63184	0.825641	0.746061	1	1	1	1	1	1	1	1	0.8074	0.60237
Buteo lagopus	-	I	2.91576	0.43756	142.2	2.35109	0.41172	121.6	0.54179	1.478	6.426	1.36872	1.16205	1.23437	1.54096	3.82445	1.41721	1.2176	1.38497	1.34668	2.85808	1.5078	0.517326	1.56273	1.27658	1.10233	1.64836	1.38087	1.12488	1.64343	0.840728	2.58758	1.33862
Rough-legged hawk	Female	II	2.81662	0.40971	134.9	2.25415	0.38024	117	0.56376	1.794		1.32218	1.08809	1.17101	1.5249	3.59029	1.35877	1.1245	1.33257	1.32186	2.69929	1.41548	0.627931	1.5096	1.19533	1.04574	1.5804	1.27529	1.08233	1.54281	1.02048	2.00128	1.25666
MOR OST-1274	830 g	III	2.13028	0.37654	115.2	1.65896	0.33814	87.8	0.53281	2.857		1	1	1	1.26152	2.53644	1	1	1	1.19625	1.83313	1	1	1.14175	1.09855	0.893023	1.16311	1.13409	0.812211	1.08996	1.62514	0.8878	0.8878
	Right	IV	1.86581	0.34276	129	1.42632	0.29816	108.1	0.46807	1.758		0.875852	0.910288	1.11979	1.03359	2.32711	0.859768	0.881765	1.23121	0.880956	1.6621	0.917468	0.615331	1	1	1	1	1	1	1	1	1.32372	0.814528
Buteo regalis	Fledgling	I	2.80681	0.44663	118.2	2.15207	0.40476	105.3	0.62675	1.921	8.017	1.32457	1.17823	1.15882	1.63555	3.3741	1.33428	1.24972	1.25357	1.3536	2.48769	1.39019	0.508739	1.64469	1.34515	1.09141	1.70714	1.38892	1.07559	1.69564	0.684848	1.75643	0.893564
Ferruginous hawk	Male	II	2.79521	0.46803	113.7	2.0534	0.40553	97.3	0.69272	2.539		1.31909	1.23468	1.11471	1.6693	3.31262	1.2731	1.2521	1.15833	1.36768	2.3226	1.36486	0.672405	1.63789	1.4096	1.04986	1.62887	1.39157	0.993871	1.66475	0.905169	1.30469	0.877282
MOR OST-1277	850 g	III	2.11904	0.37907	102	1.61291	0.32388	84	0.55741	3.776		1	1	1	1.36335	2.42708	1	1	1	1.20523	1.76696	1	1	1.24168	1.14167	0.941828	1.27945	1.11139	0.858018	1.21972	1.34617	0.642765	0.642765
	Right	IV	1.70659	0.33203	108.3	1.26063	0.29142	97.9	0.53733	2.805		0.80536	0.875907	1.06176	1.05273	1.98986	0.781587	0.899778	1.16548	0.83581	1.42813	0.81986	0.74285	1	1	1	1	1	1	1	1	0.709399	0.526977
Buteo swainsoni	-	I	2.4517	0.34569	130	1.83188	0.29529	118	0.60235	1.52	6.027	1.26742	1.06069	1.19266	1.35258	3.0689	1.2375	1.00881	1.32139	1.06857	2.2007	1.35784	0.473815	1.65405	1.28912	1.13736	1.64908	1.30256	1.13462	1.7438	0.661157	2.01901	0.956639
Swainson's hawk	Male	II	2.35739	0.36274	122.2	1.75293	0.29873	106.4	0.64105	1.963		1.21867	1.11301	1.1211	1.34637	2.87152	1.18416	1.02057	1.19149	1.09458	2.03267	1.27051	0.611908	1.59042	1.3527	1.06912	1.57801	1.31773	1.02308	1.63165	0.853849	1.46282	0.895111
MOR OST-1273	-	III	1.9344	0.32591	109	1.48031	0.29271	89.3	0.4893	3.208		1	1	1	1.18804	2.26013	1	1	1	1.05319	1.64148	1	1	1.30505	1.21536	0.953631	1.33259	1.29118	0.858654	1.28425	1.39539	0.70453	0.70453
	Right	IV	1.48224	0.26816	114.3	1.11085	0.2267	104	0.41962	2.299		0.766253	0.822804	1.04862	0.882187	1.75989	0.750417	0.774487	1.16461	0.704844	1.27939	0.778664	0.716646	1	1	1	1	1	1	1	1	0.765501	0.548593
Buteo platypterus	-	I	2.05355	0.41591	130.3	1.49431	0.37775	110	0.55564	1.542	5.722	1.20259	1.29591	1.08313	1.13154	2.57332	1.15302	1.23674	1.16897	0.912108	1.75112	1.24503	0.577096	1.54652	1.36194	1.12134	1.55466	1.34049	1.2318	1.6225	0.682301	1.66882	0.963067
Broad winged hawk	-	II	1.94795	0.32173	124.2	1.5103	0.29697	104.7	0.44146	1.804		1.14075	1.00246	1.03242	1.10207	2.38896	1.16535	0.97227	1.11265	0.953765	1.74287	1.15583	0.67515	1.467	1.05354	1.06885	1.5713	1.05383	1.17245	1.50626	0.79823	1.32426	0.894073
MOR OST-1279	360 g	III	1.7076	0.32094	120.3	1.296	0.30544	94.1	0.42925	2.672		1	1	1	0.984399	2.06687	1	1	1	0.885308	1.45399	1	1	1.28599	1.05095	1.03528	1.34834	1.08389	1.05375	1.30318	1.1823	0.773531	0.773531
	Right	IV	1.32785	0.30538	116.2	0.96118	0.2818	89.3	0.39639	2.26		0.777612	0.951517	0.965919	0.782034	1.58602	0.741651	0.922603	0.94899	0.683847	1.06583	0.767353	0.845808	1	1	1	1	1	1	1	1	0.70178	0.593571
Circus cyaneus	-	I	1.63095	0.22627	116.1	1.33788	0.21744	101.2	0.34875	1.248	7.746	1.14813	1.06882	1.045	0.961067	1.94744	1.19393	1.10488	1.03901	0.86568	1.52903	1.16602	0.442867	1.37624	1.12416	1.01575	1.53376	1.33727	0.974013	1.38404	0.616296	1.56045	0.69107
Northern harrier	-	II	1.73262	0.25905	126	1.33152	0.23409	113.6	0.39599	1.565		1.2197	1.22367	1.13411	0.972282	2.13816	1.18825	1.18948	1.16632	0.795636	1.5775	1.28021	0.555358	1.46203	1.28701	1.10236	1.52646	1.43967	1.09336	1.51959	0.77284	1.36624	0.758751
MSU ECO-4732	-	III	1.42053	0.2117	111.1	1.12057	0.1968	97.4	0.32191	2.818		1	1	1	0.861324	1.67016	1	1	1	0.74579	1.26781	1	1	1.19868	1.05177	0.972003	1.28463	1.21033	0.93744	1.18698	1.3916	0.592675	0.592675
	Left	IV	1.18508	0.20128	114.3	0.87229	0.1626	103.9	0.30367	2.025		0.834252	0.950779	1.0288	0.705326	1.40706	0.778434	0.82622	1.06674	0.553854	1.00436	0.842472	0.718595	1	1	1	1	1	1	1	1	0.694846	0.499313
Circus cyaneus	-	I	1.77523	0.26612	116.6	1.37709	0.23673	101.7	0.39584	1.281	7.591	1.25161	1.39688	1.05616	1.04326	2.12309	1.22549	1.36917	1.01396	0.887877	1.57598	1.27581	0.45281	1.42122	1.25998	0.936546	1.48186	1.35437	0.878997	1.3845	0.589236	1.65737	0.750472
Northern harrier	-	II	1.70692	0.2475	125.2	1.31191	0.22352	115.4	0.39447	1.69		1.20345	1.29914	1.13406	0.961303	2.10059	1.16748	1.29277	1.15055	0.776038	1.56303	1.2623	0.597384	1.36653	1.17182	1.00562	1.41172	1.27879	0.997407	1.36984	0.777369	1.24296	0.742522
MSU ECO-4732	-	III	1.41836	0.19051	110.4	1.12371	0.1729	100.3	0.31223	2.829		1	1	1	0.863643	1.66411	1	1	1	0.731844	1.28114	1	1	1.13551	0.901993	0.886747	1.2092	0.989187	0.866897	1.08519	1.30129	0.588231	0.588231
	Right	IV	1.24909	0.21121	124.5	0.9293	0.17479	115.7	0.32943	2.174		0.880658	1.10866	1.12772	0.70571	1.53346	0.826993	1.01093	1.15354	0.548805	1.10823	0.921494	0.768469	1	1	1	1	1	1	1	1	0.705365	0.542051
Falco columbarius	-	I	1.17527	0.20276	135.7	0.83356	0.16573	113.3	0.3402	1.161	3.1	1.01385	1.17141	1.06515	0.634458	1.50266	0.930178	1.06503	1.04617	0.498942	0.986636	1.04525	0.425743	1.17712	1.00841	0.945645	1.11116	0.94433	1.03945	1.14138	0.693963	1.29428	0.55103
Merlin	-	II	1.08049	0.18232	125.6	0.80113	0.14823	105	0.27788	1.449		0.932084	1.05332	0.985871	0.607415	1.33154	0.893989	0.952574	0.969529	0.504901	0.92528	0.926219	0.531353	1.08219	0.906749	0.875261	1.06793	0.844615	0.963303	1.0114	0.866109	0.918934	0.488278
MOR OST-1267	160 g	III	1.15922	0.17309	127.4	0.89613	0.15561	108.3	0.26093	2.727		1	1	1	0.646535	1.4376	1	1	1	0.552789	1.04488	1	1	1.16104	0.860844	0.887805	1.19457	0.886667	0.993578	1.09196	1.63001	0.527174	0.527174
	Left	IV	0.99843	0.20107	143.5	0.75017	0.1755	109	0.24618	1.673		0.861295	1.16165	1.12637	0.525656	1.31653	0.837122	1.12782	1.00646	0.460727	0.876491	0.915782	0.613495	1	1	1	1	1	1	1	1	0.786928	0.482776
Falco sparverius	-	I	1.00609	0.18663	116	0.72238	0.15123	113.6	0.28478	0.964	3.098	1.06414	1.36916	1.14625	0.59318	1.20094	0.953297	1.24101	1.23478	0.431651	0.855831	1.11144	0.477228	1.21598	1.34112	1.01399	1.16086	1.31367	1.14516	1.22211	0.659371	1.24579	0.594525
Kestrel	-	II	0.99794	0.18656	111.7	0.74175	0.14802	100.3	0.27506	1.279		1.05552	1.36865	1.10375	0.602933	1.17544	0.978859	1.21467	1.09022	0.483083	0.845669	1.08784	0.633168	1.20613	1.34062	0.976399	1.19199	1.28579	1.01109	1.19616	0.874829	0.919029	0.5819
MOR OST-1266	-	III	0.94545	0.13631	101.2	0.75777	0.12186	92	0.22541	2.02		1	1	1	0.611757	1.08053	1	1	1	0.526712	0.845743	1	1	1.14269	0.97952	0.884615	1.21773	1.05855	0.927419	1.09958	1.38167	0.534916	0.534916
	Left	IV	0.82739	0.13916	114.4	0.62228	0.11512	99.2	0.19697	1.462		0.875128	1.02091	1.13043	0.492162	0.982679	0.821199	0.944691	1.07826	0.408568	0.707381	0.909442	0.723762	1	1	1	1	1	1	1	1	0.672147	0.486475
Falco peregrinus	Adult	I	2.01635	0.42146	150.8	1.43482	0.35	125	0.60919	1.831	3.988	1.10657	1.33899	1.10964	1.04182	2.74201	1.06429	1.2988	1.11807	0.808795	1.76452	1.17606	0.419858	1.25494	1.28263	1.07407	1.24139	1.26222	1.08696	1.31053	0.597975	1.49755	0.628758
Peregrine falcon	Male	II	1.83938	0.34191	135.8	1.30435	0.27321	110.5	0.53717	2.458		1.00945	1.08626	0.999264	0.992619	2.35266	0.967511	1.01384	0.988372	0.793741	1.5308	1.00906	0.563632	1.1448	1.04054	0.967236	1.12851	0.985286	0.96087	1.12444	0.802743	0.957145	0.539478
MOR OST-1265	580 g	III	1.82216	0.31476	135.9	1.34815	0.26948	111.8	0.45708	4.361		1	1	1	0.982978	2.33153	1	1	1	0.814041	1.58842	1	1	1.13408	0.957911	0.967949	1.1664	0.971835	0.972174	1.11434	1.42423	0.534632	0.534632
	Left	IV	1.60673	0.32859	140.4	1.15582	0.27729	115	0.45073	3.062		0.881772	1.04394	1.03311	0.853844	2.09229	0.857338	1.02898	1.02862	0.685222	1.37533	0.897392	0.702133	1	1	1	1	1	1	1	1	0.68331	0.479774
Falco mexicanus	-	I	2.39249	0.46224	124.2	1.66501	0.39023	98.3	0.65831	2.027	5.059	1.20957	1.37351	1.14681	1.35358	2.93415	1.11234	1.29391	1.19296	1.10058	1.88822	1.27224	0.405968	1.36085	1.46673	1.11892	1.34686	1.42743	1.11959	1.41993	0.608526	1.44753	0.587652
Prairie falcon	Female	II	2.03638	0.37202	116.2	1.45037	0.3146	96.4	0.60524	2.943		1.02953	1.10543	1.07295	1.19932	2.43231	0.968948	1.04314	1.1699	0.972781	1.6367	1.05464	0.589425	1.1583	1.18045	1.04685	1.17323	1.15078	1.09795	1.17707	0.883518	0.826473	0.487144
MOR OST-1270	930 g	III	1.97797	0.33654	108.3	1.49685	0.30159	82.4	0.48295	4.993		1	1	1	1.22014	2.30629	1	1	1	1.13623	1.63408	1	1	1.12507	1.06787	0.975676	1.21083	1.10319	0.938497	1.11609	1.49895	0.461905	0.461905
	Right	IV	1.75808	0.31515	111	1.23622	0.27338	87.8	0.47823	3.331		0.88883	0.936441	1.02493	1.06663	2.0664	0.825881	0.906462	1.06553	0.891417	1.36601	0.895986	0.667134	1	1	1	1	1	1	1	1	0.620355	0.41386
Cathartes aura	-	I	1.28619	0.39895	100.5	0.7782	0.34712	64.3	0.55797	1.767	5.545	0.603876	0.964836	0.981445	0.836446	1.46717	0.526519	0.901353	0.870095	0.731202	0.820589	0.600763	0.300612	0.82332	1.22792	0.795095	0.701701	1.2062	0.592627	0.759977	0.469822	0.830319	0.249604
Turkey vulture	-	II	2.041	0.48734	125.7	1.37566	0.46278	84.2	0.64963	2.868		0.958265	1.1786	1.22754	1.14687	2.51609	0.930751	1.20168	1.13938	1.02596	1.50772	1.03026	0.487921	1.30649	1.49997	0.994462	1.24043	1.6081	0.776037	1.3033	0.762563	0.877297	0.428052
MOR OST-1269	-	III	2.12989	0.41349	102.4	1.47801	0.38511	73.9	0.62834	5.878		1	1	1	1.36647	2.44219	1	1	1	1.22938	1.58566	1	1	1.36339	1.27267	0.810127	1.33272	1.33821	0.681106	1.26502	1.56288	0.415479	0.415479
	Right	IV	1.5622	0.3249	126.4	1.10902	0.28778	108.5	0.45942	3.761		0.733465	0.785751	1.23438	0.875098	1.93055	0.750347	0.747267	1.4682	0.683253	1.29386	0.790501	0.639843	1	1	1	1	1	1	1	1	0.513308	0.328437
Cariama cristata	-	I	1.35915	0.34515	106.8	0.85002	0.3094	93.8	0.5357	0.74454	18.8841	0.898338	0.911504	1.17621	0.846488	1.57786	0.867651	0.997775	1.31006	0.582076	0.952928	0.93714	0.15481	1.1491	1.10582	1.1195	1.18932	1.25757	1.25401	1.18516	0.254028	2.11924	0.328081
Crested seriema	-	II	1.48296	0.3663	112.5	1.04702	0.31459	109.6	0.56281	2.46307		0.980171	0.967359	1.23899	0.89177	1.75099	1.06874	1.01451	1.53073	0.640657	1.2255	1.03996	0.51214	1.25377	1.17359	1.17925	1.46496	1.27867	1.46524	1.3152	0.840369	0.710896	0.364078
AMNH-1392	-	III	1.51296	0.37866	90.8	0.97968	0.31009	71.6	0.60587	4.80937		1	1	1	1.06243	1.6837	1	1	1	0.837394	1.04645	1	1	1.27913	1.21319	0.951782	1.37074	1.26037	0.957219	1.26466	1.6409	0.350087	0.350087
	Left	IV	1.1828	0.31212	95.4	0.71471	0.24603	74.8	0.47742	2.93094		0.781779	0.824275	1.05066	0.799588	1.33135	0.729534	0.793415	1.04469	0.588359	0.768106	0.790728	0.609423	1	1	1	1	1	1	1	1	0.45424	0.276824
Sagittarius serpentarius	-	I	2.20937	0.4662	105.8	1.57983	0.37563	98.1	0.81143	3.02314	28.8758	0.933244	1.07747	1.13155	1.38504	2.55756	1.0262	1.11991	1.30975	1.04585	1.79068	0.964373	0.554324	0.895033	1.00487	0.97963	0.837511	0.992417	1.20221	0.889369	0.863545	0.845993	0.468954
Secretary bird	-	II	2.35007	0.42705	100.2	1.58181	0.34749	86.9	0.75393	2.78074		0.992676	0.986988	1.07166	1.53166	2.67859	1.02749	1.03602	1.16021	1.15004	1.74425	1.01001	0.509878	0.952031	0.920485	0.927778	0.83856	0.918071	1.06495	0.931459	0.794304	0.963267	0.491148
AMNH-4253	-	III*	2.36741	0.43268	93.5	1.53949	0.33541	74.9	0.75604	5.45374		1	1	1	1.62514	2.65204	1	1	1	1.26588	1.65483	1	1	0.959056	0.932621	0.865741	0.816125	0.886156	0.917892	0.922225	1.55783	0.486279	0.486279
	Left	IV	2.46848	0.46394	108	1.88634	0.3785	81.6	0.58175	3.50085		1.04269	1.07225	1.15508	1.5256	2.8757	1.2253	1.12847	1.08945	1.44343	2.05572	1.08433	0.641917	1	1	1	1	1	1	1	1	0.821428	0.527289
Bubo scandiacus	Adult	I	2.65358	0.55974	151.7	1.71485	0.45477	141.4	0.91358	1.968	4.784	0.791513	1.23152	1.16782	1.36831	3.62281	0.700574	1.0839	1.12759	0.908481	2.24204	0.863603	0.668478	0.974889	1.32133	1.02293	0.881857	1.16971	1.00928	0.989342	1.02553	1.84086	1.23058
Snowy owl	Female	II	3.50581	0.51501	133.9	2.49317	0.43684	122.2	0.93096	2.375		1.04572	1.13311	1.03079	1.90499	4.45196	1.01854	1.04116	0.974482	1.42391	3.03691	1.06125	0.806726	1.28799	1.21574	0.9029	1.28211	1.12359	0.872234	1.21577	1.23762	1.87451	1.51221
MOR OST-1289	1440 g	III	3.35254	0.45451	129.9	2.44778	0.41957	125.4	0.78341	2.944		1	1	1	1.85031	4.195	1	1	1	1.3773	3.01441	1	1	1.23168	1.07292	0.875927	1.25876	1.07917	0.895075	1.1456	1.53413	1.42493	1.42493
		IV	2.72193	0.42362	148.3	1.94459	0.38879	140.1	0.70931	1.919		0.811901	0.932037	1.14165	1.41475	3.66184	0.79443	0.926639	1.11722	1.03437	2.52924	0.872906	0.651834	1	1	1	1	1	1	1	1	1.9082	1.24383
Strix nebulosa	Adult	I	2.86416	0.48763	104.9	2.25873	0.46541	71.8	0.67271	1.071	4.921	0.911166	1.03121	1.18397	1.80631	3.30708	0.889383	1.08343	1.24221	1.92602	2.41359	0.950337	0.396667	1.07845	1.15162	0.996201	1.09609	1.18163	0.962466	1.07723	0.709272	3.08784	1.22484
Great grey owl	Male	II	3.18052	0.51389	106.6	2.58947	0.47307	77	0.62367	2.704		1.01181	1.08675	1.20316	1.98342	3.6902	1.01961	1.10126	1.33218	2.07985	2.79511	1.06043	1.00148	1.19758	1.21364	1.01235	1.25659	1.20108	1.03217	1.20203	1.79073	1.36472	1.36674
MOR OST-1284	940 g	III	3.1434	0.47287	88.6	2.53966	0.42957	57.8	0.63982	2.7		1	1	1	2.25038	3.4799	1	1	1	2.62751	2.65063	1	1	1.1836	1.11676	0.841406	1.23242	1.09064	0.774799	1.13353	1.78808	1.28885	1.28885
	Left	IV	2.6558	0.42343	105.3	2.06071	0.39387	74.6	0.60243	1.51		0.844881	0.895447	1.18849	1.67043	3.06997	0.811412	0.916894	1.29066	1.70029	2.2138	0.882201	0.559259	1	1	1	1	1	1	1	1	2.03309	1.13703
Bubo virginianus	Adult	I	2.67767	0.50282	134.6	1.72493	0.38644	118.9	0.90027	1.696	4.886	0.854806	1.1253	1.13109	1.45125	3.4093	0.74579	0.984385	1.18663	1.00149	2.07828	0.903029	0.440978	1.02074	1.19893	1.08548	0.927636	1.01345	1.09788	1.06045	0.681124	2.0102	0.886453
Great horned owl	Female	II	3.24686	0.51708	116.9	2.2636	0.45385	104.9	0.93987	3.202		1.03651	1.15722	0.982353	1.90502	3.8868	0.978689	1.1561	1.04691	1.42756	2.61365	1.02951	0.832553	1.23772	1.23293	0.942742	1.21732	1.19024	0.968606	1.20897	1.28594	1.21387	1.01061
MOR OST-1288	1440 g	III	3.13249	0.44683	119	2.31289	0.39257	100.2	0.81694	3.846		1	1	1	1.81777	3.77541	1	1	1	1.50743	2.63622	1	1	1.19412	1.06543	0.959677	1.24383	1.02953	0.925208	1.17432	1.54458	0.981645	0.981645
		IV	2.62326	0.41939	124	1.85949	0.38131	108.3	0.75196	2.49		0.837436	0.93859	1.04202	1.48551	3.21496	0.803968	0.971317	1.08084	1.14705	2.16814	0.851553	0.647426	1	1	1	1	1	1	1	1	1.29115	0.835923
Bubo virginianus	Subadult	I	2.51625	0.39558	122.5	1.68212	0.32525	103.2	0.75781	1.546	5.436	0.841747	0.892897	1.10162	1.43503	3.06812	0.775746	0.84007	1.04137	1.0732	1.93303	0.872694	0.375334	0.918045	0.987025	1.03114	0.861742	0.88146	0.958217	0.929378	0.526029	1.98456	0.744871
Great horned owl	-	II	3.16498	0.50322	113.2	2.25754	0.43933	95.2	0.82871	3.701		1.05876	1.13586	1.01799	1.89554	3.74505	1.04111	1.13472	0.960646	1.52856	2.53978	1.06524	0.898519	1.15473	1.2556	0.952862	1.15653	1.19063	0.883937	1.13443	1.25927	1.0119	0.909213
MOR OST-1287	-	III	2.98932	0.44303	111.2	2.16839	0.38717	99.1	0.73712	4.119		1	1	1	1.81146	3.51569	1	1	1	1.42475	2.46428	1	1	1.09064	1.10542	0.936027	1.11086	1.04927	0.920149	1.06495	1.4015	0.853531	0.853531
	Left	IV	2.74088	0.40078	118.8	1.952	0.36899	107.7	0.78117	2.939		0.916891	0.904634	1.06835	1.59216	3.30127	0.900207	0.953044	1.08678	1.20871	2.27203	0.939009	0.713523	1	1	1	1	1	1	1	1	1.12326	0.801473
Bubo virginianus	6 weeks old	I	2.3414	0.39813	108.6	1.6711	0.34666	93.9	0.66794	1.514	4.705	0.887173	1.06583	1.05745	1.4416	2.73245	0.823028	1.05863	1.00859	1.1434	1.87388	0.902203	0.385046	0.983339	1.09319	1.04524	0.894019	1.05686	1.04566	0.996673	0.513394	1.80479	0.694926
Great horned owl	-	II	2.72266	0.42503	109.3	1.97721	0.3515	96.6	0.7266	3.415		1.03163	1.13784	1.06426	1.66905	3.18395	0.973789	1.07341	1.03759	1.32408	2.23237	1.05128	0.868515	1.14346	1.16706	1.05197	1.05778	1.07161	1.07572	1.16136	1.15802	0.932342	0.809753
MOR OST-1286	-	III	2.63917	0.37354	102.7	2.03043	0.32746	93.1	0.64744	3.932		1	1	1	1.68966	3.02864	1	1	1	1.39842	2.27229	1	1	1.1084	1.02567	0.98845	1.08626	0.998323	1.03675	1.10471	1.33333	0.770254	0.770254
	Left	IV	2.38107	0.36419	103.9	1.8692	0.32801	89.8	0.62976	2.949		0.902204	0.974969	1.01168	1.51184	2.74157	0.920593	1.00168	0.964554	1.32404	2.07517	0.905215	0.75	1	1	1	1	1	1	1	1	0.929661	0.697246
Bubo virginianus	2 weeks old	I	1.48257	0.28388	75.9	1.05111	0.23599	66.6	0.47099	0.771	2.696	0.942835	1.02595	0.966879	1.20539	1.59679	0.859382	0.988398	1	0.957255	1.1127	0.937892	0.362482	1.08287	1.06494	0.946384	1.01036	1.03102	1.03096	1.07339	0.584977	2.07106	0.750724
Great horned owl	-	II	1.67721	0.32796	80.8	1.27153	0.27205	64.1	0.50022	1.707		1.06662	1.18525	1.0293	1.2939	1.8247	1.0396	1.13943	0.962462	1.19807	1.34034	1.07176	0.802539	1.22504	1.2303	1.00748	1.22224	1.18856	0.99226	1.22659	1.29514	1.06895	0.857874
MOR OST-1285	370 g	III	1.57246	0.2767	78.5	1.2231	0.23876	66.6	0.43733	2.127		1	1	1	1.24265	1.70253	1	1	1	1.11389	1.29477	1	1	1.14853	1.038	0.978803	1.17568	1.04312	1.03096	1.14447	1.61381	0.800438	0.800438
	Right	IV	1.36911	0.26657	80.2	1.04033	0.22889	64.6	0.39683	1.318		0.87068	0.96339	1.02166	1.06277	1.48762	0.850568	0.958661	0.96997	0.973449	1.09755	0.873767	0.619652	1	1	1	1	1	1	1	1	1.12869	0.699396
Asio flammeus	Adult	I	1.67098	0.24705	106.2	1.21443	0.2158	100.9	0.48079	1.301	4.215	0.873656	0.888861	1.12262	1.04477	1.93653	0.843337	0.889787	1.34354	0.787497	1.38681	0.901347	0.509996	1.07034	1.12209	1.07273	1.05945	1.08366	1.08146	1.09179	0.773024	1.48849	0.759126
Short-eared owl	-	II	1.77782	0.28424	93.4	1.35468	0.26115	77.3	0.47862	2.349		0.929516	1.02267	0.987315	1.22141	1.99107	0.94073	1.07677	1.02929	1.08451	1.46315	0.926731	0.920815	1.13877	1.291	0.943434	1.18181	1.31139	0.82851	1.12253	1.39572	0.847624	0.780505
MOR OST-1282	390 g	III	1.91263	0.27794	94.6	1.44003	0.24253	75.1	0.44295	2.551		1	1	1	1.30126	2.14849	1	1	1	1.18141	1.54853	1	1	1.22513	1.26239	0.955556	1.25626	1.21789	0.80493	1.21128	1.51575	0.842213	0.842213
	Left	IV	1.56117	0.22017	99	1.14628	0.19914	93.3	0.41326	1.683		0.816243	0.792149	1.04651	1.02654	1.77373	0.796011	0.821094	1.24234	0.788175	1.28346	0.825571	0.659741	1	1	1	1	1	1	1	1	1.05391	0.695307
Asio otus	-	I	1.48987	0.18866	119.8	1.12503	0.15799	114.1	0.38336	1.199	3.732	0.853593	0.884523	1.18379	0.861046	1.80036	0.804478	0.769557	1.33763	0.670343	1.33493	0.902537	0.510865	1.07657	1.08419	1.10721	1.05758	0.986759	1.03633	1.11606	0.695072	1.50156	0.767092
Long-eared owl	-	II	1.67302	0.20079	102.6	1.27658	0.18637	97.7	0.3912	2.092		0.958526	0.941394	1.01383	1.07186	1.91938	0.912847	0.907793	1.14537	0.847675	1.44544	0.962202	0.891351	1.20892	1.1539	0.948244	1.20004	1.16401	0.887375	1.18984	1.21275	0.917487	0.817803
MOR OST-1283	160 g	III	1.74541	0.21329	101.2	1.39846	0.2053	85.3	0.35168	2.347		1	1	1	1.12937	1.99478	1	1	1	1.03205	1.53648	1	1	1.26123	1.22573	0.935305	1.31461	1.28224	0.77475	1.23658	1.36058	0.849929	0.849929
	Right	IV	1.3839	0.17401	108.2	1.06378	0.16011	110.1	0.32317	1.725		0.79288	0.815838	1.06917	0.854215	1.61314	0.76068	0.779883	1.29074	0.648922	1.24697	0.80868	0.734981	1	1	1	1	1	1	1	1	0.935153	0.68732
Megascops asio	-	I	1.07782	0.19054	143.4	0.74349	0.16458	129.1	0.31223	0.755	3.361	0.781204	0.849942	1.33395	0.567617	1.42063	0.696386	0.860459	1.36903	0.411696	0.927641	0.885154	0.462623	1.01911	0.984093	1.08884	1.01621	0.940081	1.12359	1.06646	0.698427	1.88163	0.870486
Eastern screech owl	Male	II	1.37988	0.26828	121.2	1.04178	0.22938	95.3	0.35668	1.356		1.00014	1.19672	1.12744	0.79193	1.6752	0.975778	1.19925	1.0106	0.704816	1.17232	1.04377	0.830882	1.30472	1.3856	0.920273	1.42392	1.31022	0.829417	1.25756	1.25439	1.2354	1.02647
MOR OST-1281	140 g	III	1.37969	0.22418	107.5	1.06764	0.19127	94.3	0.33326	1.632		1	1	1	0.855415	1.60495	1	1	1	0.728132	1.19839	1	1	1.30454	1.15783	0.816249	1.45926	1.09253	0.820714	1.20483	1.50971	0.983428	0.983428
	Left	IV	1.05761	0.19362	131.7	0.73163	0.17507	114.9	0.31621	1.081		0.766556	0.863681	1.22512	0.579527	1.3321	0.685278	0.915303	1.21845	0.433984	0.870305	0.829992	0.662377	1	1	1	1	1	1	1	1	1.23228	0.816237
Corvus brachyrhynchos	-	I	1.75616	0.33466	122.6	1.39571	0.32725	95.5	0.40587	1.72399		1.20243	1.4085	1.30287	1.00106	2.14205	1.23203	1.52749	1.23705	0.942769	1.5714	1.30728	0.570805	1.53046	1.36635	1.04697	1.56913	1.39427	1.14508	1.55841	0.860618	1.2425	0.709223
American crow	-	II	1.35456	0.28826	118.1	1.0264	0.26544	81.4	0.34663	2.13109		0.927457	1.21322	1.25505	0.789724	1.62781	0.906033	1.23898	1.0544	0.786998	1.11809	0.99344	0.705594	1.18048	1.17691	1.00854	1.15393	1.13093	0.976019	1.18428	1.06384	0.763837	0.538958
MSU ECO teaching box	-	III	1.46051	0.2376	94.1	1.13285	0.21424	77.2	0.33251	3.02028		1	1	1	0.997686	1.63855	1	1	1	0.907908	1.22331	1	1	1.27281	0.970073	0.803587	1.27361	0.912786	0.925659	1.1921	1.50773	0.542517	0.542517
	Left	IV	1.14747	0.24493	117.1	0.88948	0.23471	83.4	0.29214	2.0032		0.785664	1.03085	1.24442	0.672533	1.37451	0.78517	1.09555	1.08031	0.66855	0.973145	0.838855	0.66325	1	1	1	1	1	1	1	1	0.686157	0.455093
Colaptes auratus	-	I	0.74151	0.17905	124.2	0.52161	0.14775	97	0.2136	0.75394		0.645791	0.725927	0.869139	0.419517	0.909387	0.610971	0.678717	0.817186	0.348225	0.589534	0.602107	0.383337	0.763766	0.793872	1.0073	0.73193	0.798605	0.985772	0.766118	0.40113	1.20618	0.462374
Northern flicker	-	II	0.98865	0.23102	132.2	0.7209	0.21014	106.3	0.29667	1.27239		0.861028	0.936631	0.925122	0.540687	1.24754	0.844402	0.965318	0.895535	0.450445	0.835704	0.825999	0.646941	1.01832	1.0243	1.07218	1.01158	1.13583	1.08028	1.051	0.676969	0.98047	0.634306
MSU ECO teaching box	-	III	1.14822	0.24665	142.9	0.85374	0.21769	118.7	0.30385	1.96678		1	1	1	0.605572	1.51034	1	1	1	0.496189	1.02796	1	1	1.18268	1.0936	1.15896	1.19798	1.17664	1.2063	1.2724	1.04642	0.767926	0.767926
	Left	IV	0.97086	0.22554	123.3	0.71265	0.18501	98.4	0.27835	1.87954		0.845535	0.914413	0.862841	0.551585	1.18701	0.834739	0.849878	0.828981	0.47071	0.808399	0.785919	0.955643	1	1	1	1	1	1	1	1	0.631541	0.603528
Eremophila alpestris	-	I	1.09366	0.09571	34.6	0.99815	0.09335	26.7	0.15075	1.33864	4.14904	1.52265	1.17623	0.670543	1.83886	1.11046	1.70706	1.12687	0.648058	2.16144	1.00724	1.49432	0.491376	2.08261	1.06688	0.507331	2.38986	1.17881	0.778426	1.99195	0.724894	0.829541	0.407616
Horned lark	-	II	0.63426	0.08871	60.8	0.49528	0.08131	39.9	0.13355	2.06914		0.883051	1.09021	1.17829	0.626697	0.665026	0.847038	0.981531	0.968447	0.725791	0.505431	0.894911	0.759521	1.20779	0.988853	0.891496	1.18584	1.02677	1.16327	1.19293	1.12047	0.321402	0.244112
MSU ECO-Horned Lark	-	III	0.71826	0.08137	51.6	0.58472	0.08284	41.2	0.13593	2.72427		1	1	1	0.825148	0.74312	1	1	1	0.830942	0.59751	1	1	1.36775	0.907034	0.756598	1.39999	1.04609	1.20117	1.33302	1.47523	0.272778	0.272778
	Left	IV	0.52514	0.08971	68.2	0.41766	0.07919	34.3	0.12308	1.84667		0.731128	1.10249	1.32171	0.468341	0.557473	0.714291	0.955939	0.832524	0.7082	0.423963	0.750179	0.677859	1	1	1	1	1	1	1	1	0.30188	0.204632
Spizella arborea	-	I	0.77727	0.11752	110.5	0.64819	0.10598	99.6	0.13369	0.74171	2.40204	1.06774	1.59392	1.1264	0.472995	0.912213	1.10518	1.58962	1.00101	0.424321	0.737618	1.10556	0.470324	1.59322	1.51443	1.06867	1.60722	1.20637	1.10544	1.62622	0.730015	1.22988	0.578441
American tree sparrow	-	II	0.52493	0.08552	97.3	0.45101	0.08859	83.8	0.11641	1.04432		0.721097	1.15991	0.991845	0.349633	0.593748	0.768986	1.32878	0.842211	0.337667	0.493867	0.719594	0.662211	1.07598	1.10206	0.941006	1.1183	1.00842	0.930078	1.05849	1.02785	0.56855	0.3765
MSU ECO-"tree sparrow"	-	III	0.72796	0.07373	98.1	0.5865	0.06667	99.5	0.13808	1.57702		1	1	1	0.481913	0.825116	1	1	1	0.384221	0.667239	1	1	1.49215	0.950129	0.948743	1.45425	0.758907	1.10433	1.47095	1.55215	0.523212	0.523212
	Left	IV	0.48786	0.0776	103.4	0.4033	0.08785	90.1	0.11518	1.01602		0.670174	1.05249	1.05403	0.310827	0.560941	0.687639	1.31768	0.905528	0.284928	0.448061	0.679833	0.644266	1	1	1	1	1	1	1	1	0.552096	0.355697
Spizella arborea	-	I	0.74899	0.10192	111	0.65255	0.1091	97.1	0.13324	0.79884	2.25601	1.0445	1.29934	1.19227	0.454415	0.880344	1.14754	1.47413	1.11353	0.435304	0.737716	1.09701	0.497007	1.49088	1.31036	1.10338	1.63789	1.45914	1.16427	1.53577	0.727766	1.10203	0.547716
American tree sparrow	-	II	0.50894	0.0869	99.3	0.41863	0.08139	78.4	0.11972	0.974		0.709739	1.10785	1.0666	0.333905	0.578694	0.736182	1.09972	0.899083	0.331179	0.453165	0.721118	0.605985	1.01306	1.11725	0.987078	1.05075	1.08854	0.940048	1.00954	0.887342	0.594142	0.360041
MSU ECO-"tree sparrow"	-	III	0.71708	0.07844	93.1	0.56865	0.07401	87.2	0.13027	1.6073		1	1	1	0.493874	0.802496	1	1	1	0.412293	0.627479	1	1	1.42737	1.00849	0.925447	1.4273	0.989835	1.04556	1.39997	1.4643	0.499282	0.499282
	Right	IV	0.50238	0.07778	100.6	0.39841	0.07477	83.4	0.11889	1.09766		0.700591	0.991586	1.08056	0.326475	0.573226	0.700624	1.01027	0.956422	0.299453	0.435885	0.714303	0.682922	1	1	1	1	1	1	1	1	0.522225	0.356639
Turdus migratorius	-	I	0.85385	0.11369	96.1	0.71917	0.12016	78.5	0.16184	0.94299		1.17179	1.06471	0.981614	0.574033	0.962804	1.3597	1.24829	0.848649	0.568329	0.778659	1.16635	0.451487	1.46629	0.911051	0.880843	1.65159	1.05542	1.03154	1.41469	0.707695	1.02101	0.460974
American Robin	-	II	0.57378	0.12884	108.4	0.44156	0.11262	83.8	0.15888	1.26807		0.787435	1.20659	1.10725	0.353721	0.669217	0.834833	1.16996	0.905946	0.330592	0.483519	0.810693	0.60713	0.985335	1.03245	0.993584	1.01405	0.989196	1.10118	0.983307	0.951662	0.527745	0.32041
MSU ECO-"robin"	-	III	0.72867	0.10678	97.9	0.52892	0.09626	92.5	0.21626	2.08863		1	1	1	0.483115	0.825488	1	1	1	0.366104	0.591048	1	1	1.25132	0.855678	0.897342	1.21468	0.845498	1.21551	1.21292	1.56748	0.395229	0.395229
	Left	IV	0.58232	0.12479	109.1	0.43544	0.11385	76.1	0.15761	1.33248		0.799155	1.16866	1.1144	0.357417	0.680578	0.823262	1.18273	0.822703	0.353241	0.469174	0.824455	0.637968	1	1	1	1	1	1	1	1	0.51076	0.325849
Meleagris gallopavo	Juvenile	I	1.92887	0.60206	149.8	1.12582	0.43562	114.7	0.76109	2.39262	15.0006	0.741027	1.08065	1.36058	0.998925	2.61169	0.699132	0.823323	1.72481	0.668554	1.33837	0.855949	0.269032	0.930684	1.04989	1.14351	0.842232	0.82067	1.24946	1.00306	0.359318	1.09156	0.293665
Turkey	Female	II	2.26603	0.54204	120.7	1.26508	0.51884	77.9	0.72787	5.79342		0.870556	0.972915	1.09628	1.30372	2.74643	0.785613	0.980609	1.17143	1.0062	1.36804	0.900108	0.651427	1.09336	0.945226	0.921374	0.946413	0.97745	0.848584	1.0548	0.870042	0.47406	0.308816
MSU ECO turkey4102	-	III	2.60297	0.55713	110.1	1.61031	0.5291	66.5	0.74182	8.89343		1	1	1	1.58785	3.05122	1	1	1	1.46848	1.70438	1	1	1.25594	0.971541	0.840458	1.20468	0.996779	0.724401	1.17187	1.33559	0.343088	0.343088
	Right	IV	2.07253	0.57345	131	1.33671	0.53081	91.8	0.62153	6.65878		0.796217	1.02929	1.18983	1.1388	2.60373	0.830095	1.00323	1.38045	0.930693	1.49117	0.853341	0.74873	1	1	1	1	1	1	1	1	0.391023	0.29277
Icterus galbula	-	I	0.75072	0.15404	121.5	0.56914	0.13184	100.8	0.21014	0.82377		1.00187	1.38675	1.11776	0.430214	0.912301	0.959376	1.3568	1.04673	0.369325	0.649751	1.04296	0.516127	1.33825	1.32908	1.12709	1.37056	1.15954	1.44	1.39681	0.722016	1.10747	0.571596
Baltimore oriole	-	II	0.5808	0.1306	110.5	0.41749	0.11957	83.2	0.19066	1.16558		0.775103	1.17573	1.01656	0.353436	0.681634	0.703746	1.23052	0.863967	0.31441	0.456559	0.779255	0.730286	1.03535	1.12683	1.02505	1.00537	1.05163	1.18857	1.04364	1.02161	0.584802	0.427073
MSU ECO-teaching Boriole	-	III	0.74932	0.11108	108.7	0.59324	0.09717	96.3	0.15958	1.59606		1	1	1	0.461068	0.874725	1	1	1	0.398204	0.669283	1	1	1.33576	0.958412	1.00835	1.4286	0.854617	1.37571	1.33928	1.39891	0.548053	0.548053
	Left	IV	0.56097	0.1159	107.8	0.41526	0.1137	70	0.14639	1.14093		0.748639	1.04339	0.99172	0.347139	0.65313	0.699987	1.17011	0.726895	0.361992	0.442256	0.746669	0.714842	1	1	1	1	1	1	1	1	0.572454	0.409214
Icterus galbula	-	I	0.73284	0.16519	140	0.57171	0.1563	114.9	0.17596	0.91008	2.36902	1.0033	1.68013	1.25899	0.389936	0.952793	0.945866	1.68463	1.15361	0.339124	0.680073	1.10913	0.535281	1.29329	1.38979	1.27389	1.39687	1.43751	1.532	1.43528	0.872987	1.04693	0.560404
Baltimore oriole	-	II	0.59201	0.12645	109.3	0.42711	0.11922	73.6	0.16497	0.93098		0.810495	1.28611	0.982914	0.362914	0.692312	0.706633	1.28498	0.738956	0.356505	0.457953	0.805907	0.547574	1.04475	1.06386	0.99454	1.04356	1.09648	0.981333	1.0429	0.893035	0.743638	0.407197
MSU ECO-teaching Boriole	-	III	0.73043	0.09832	111.2	0.60443	0.09278	99.6	0.15672	1.70019		1	1	1	0.442624	0.859047	1	1	1	0.395675	0.687821	1	1	1.28903	0.827192	1.01183	1.47681	0.853306	1.328	1.29406	1.63089	0.505265	0.505265
	Right	IV	0.56665	0.11886	109.9	0.40928	0.10873	75	0.15026	1.04249		0.775776	1.20891	0.988309	0.346088	0.663836	0.677134	1.17191	0.753012	0.336158	0.44003	0.772759	0.613161	1	1	1	1	1	1	1	1	0.63678	0.390448
Phasianus colchicus	-	I	0.81696	0.27118	70.7	0.52599	0.22562	28.4	0.33737	0.922	5.175	0.545783	1.08403	0.929041	0.706017	0.871188	0.456038	0.997612	0.48547	1.0721	0.531413	0.540164	0.233891	0.761827	1.08312	0.788183	0.650036	1.03453	0.437596	0.731935	0.340724	0.94489	0.221002
Common pheasant	Female	II	1.235	0.28956	81.4	0.97787	0.29128	34.5	0.31613	2.692		0.82506	1.1575	1.06965	0.946943	1.34532	0.847823	1.28794	0.589744	1.64879	0.992801	0.83414	0.682902	1.15165	1.15653	0.907469	1.20849	1.3356	0.531587	1.13028	0.994826	0.499747	0.341279
MOR OST-1384	-	III	1.49686	0.25016	76.1	1.15339	0.22616	58.5	0.404	3.942		1	1	1	1.2143	1.61282	1	1	1	1.18025	1.20506	1	1	1.39584	0.999161	0.848384	1.4254	1.037	0.901387	1.35502	1.45676	0.409138	0.409138
	Left	IV	1.07237	0.25037	89.7	0.80917	0.21809	64.9	0.32855	2.706		0.716413	1.00084	1.17871	0.760273	1.19025	0.701558	0.964317	1.1094	0.75403	0.854104	0.737994	0.686454	1	1	1	1	1	1	1	1	0.439857	0.301942
Table S3: Eagle ungual measurements with and without keratin sheaths (from Fowler et al., 2009)
Specimen		Digit	Outer curvature			Ratios to D-III					Inner, ratio to D-III					ALo ratio	Toe ratio	Outer, ratio to D-IV			Inner, ratio to D-IV			ALo ratio
			Ao	Hmo	Oo	Ao	Hmo	Oo	radius	ALo	Ai	Hmi	Oi	radius	ALi	to D-III	to D-III	Ao	Hmo	Oo	Ai	Hmi	Oi	to D-IV
MSU-GEO-robert pic1		1-2a*	3.61895	0.64798	105.9	1.21249	1.28865	1.09855	2.2672	4.19047	N/A					1.24414	N/A	1.36702	1.46118	1.0413	N/A			1.38315
without sheaths		1-2b*	3.90354	0.629864	114.7	1.30784	1.25262	1.18983	2.31807	4.64052						1.37776		1.47453	1.42033	1.12783				1.53169
		1-2c*	3.81774	0.58434	117.3	1.27909	1.16209	1.2168	2.2352	4.57606						1.35862		1.44212	1.31768	1.15339				1.51041
full length		3*	2.98472	0.502837	96.4	1	1	1	2.00189	3.36817						1		1.12745	1.13389	0.947886				1.11173
of preserved bone core		4*	2.64732	0.443462	101.7	0.886958	0.88192	1.05498	1.70686	3.02967						0.8995		1	1	1				1
MSU-GEO-robert pic2		1-2a	4.54872	0.80187	155.7	1.19811	1.34961	1.23866	2.32647	6.32214	N/A					1.3508	N/A	1.35529	1.41212	1.13567	N/A			1.46538
with sheaths		1-2b	4.73642	0.76072	159.5	1.24755	1.28035	1.26889	2.40662	6.69954						1.43143		1.41122	1.33965	1.16338				1.55285
full length		1-2c	4.71216	0.77919	154.7	1.24116	1.31144	1.23071	2.41469	6.51973						1.39301		1.40399	1.37218	1.12837				1.51118
bone to keratinous tip		3	3.79657	0.59415	125.7	1	1	1	2.13335	4.68031						1		1.13119	1.04632	0.916849				1.08482
		4	3.35627	0.56785	137.1	0.884027	0.955735	1.09069	1.80302	4.31434						0.921808		1	1	1				1
MSU-GEO-robert pic2		1-2a	4.49255	0.74774	148.7	1.20008	1.24065	1.24539	2.33276	6.05421	N/A					1.34009	N/A	1.36348	1.34699	1.12057	N/A			1.45344
with sheaths		1-2b	4.77156	0.76924	154.1	1.27462	1.27632	1.29062	2.44804	6.58414						1.45739		1.44816	1.38572	1.16127				1.58066
length of keratinous sheath		1-2c	4.67161	0.76286	148.9	1.24792	1.26574	1.24707	2.42455	6.30091						1.3947		1.41783	1.37423	1.12208				1.51267
only		3	3.74353	0.6027	119.4	1	1	1	2.16791	4.51776						1		1.13616	1.08571	0.899774				1.08458
		4	3.29491	0.55512	132.7	0.880161	0.921055	1.11139	1.79851	4.16543						0.922013		1	1	1				1
MSU-GEO-robert pic2		1-2a	4.41026	0.72744	141.5	N/A			2.33572	5.7684	N/A							1.41276	1.53689	1.18708	N/A			1.53215
with sheaths		1-2b	4.59384	0.76561	144				2.41512	6.06987								1.47157	1.61753	1.20805				1.61223
length of sheath exposed		1-2c	4.58424	0.72855	135.8				2.47388	5.86348								1.46849	1.53923	1.13926				1.55741
to air, ie. Not under skin		3	not possible to tell						N/A									N/A						N/A
		4	3.12173	0.47332	119.2				1.80967	3.7649								1	1	1				1
